# Supplementary material for: AI Without Networks
Source: Research Square preprint supplement (doi:10.21203/rs.3.rs-3721935/v1), 2024-06-13
Supplement: Supplementary file 1 [file b260cb6f28a352203515995e.pdf]

# Supplementary Information for *AI without networks*, by P. P. Mitra and C. Sire

## Legends of Supplementary Movies

**Movie S1:** 2-minute collective dynamics of 2 Hilbert agents for a memory  $M = 2$ , and enforcing the presence of the wall by means of the rejection procedure.

**Movie S2:** 2-minute collective dynamics of 2 Hilbert agents for a memory  $M = 2$ , without enforcing the presence of the wall. Note the occurrence of small and short excursions of the fish outside the limits of the tank.

**Movie S3:** 1-minute collective dynamics of 5 Hilbert agents for a memory  $M = 2$ , and enforcing the presence of the wall by means of the rejection procedure.

## Extended Data Table

| $N = 2$ | Fish              | Hilbert agents    | $N = 5$          | Fish              | Hilbert agents    |
|---------|-------------------|-------------------|------------------|-------------------|-------------------|
| $V$     | $11.31 \pm 0.18$  | $11.91 \pm 0.14$  | $V$              | $15.26 \pm 0.13$  | $15.29 \pm 0.10$  |
| $r_w$   | $4.11 \pm 0.12$   | $3.90 \pm 0.05$   | $r_w$            | $7.08 \pm 0.11$   | $7.17 \pm 0.05$   |
| $d$     | $7.93 \pm 0.17$   | $8.27 \pm 0.09$   | $d$              | $4.06 \pm 0.04$   | $5.15 \pm 0.05$   |
| $P$     | $0.954 \pm 0.002$ | $0.957 \pm 0.002$ | $P$              | $0.964 \pm 0.001$ | $0.943 \pm 0.002$ |
|         |                   |                   | $R_{\text{Gyr}}$ | $7.62 \pm 0.07$   | $10.42 \pm 0.08$  |

**Extended Data Table 1:** We report the mean and standard error for the PDF of the observables appearing in Fig. 3 (for  $N = 2$  individuals) and Fig. 4 (for  $N = 5$  individuals). The speed  $V$  is expressed in cm/s, while the distance to the wall,  $r_w$ , the distance between two nearest neighbors,  $d$ , and the gyration radius,  $R_{\text{Gyr}}$  (only for  $N = 5$ ), are expressed in cm. Finally, the polarization,  $P$ , is without unit and between 0 and 1.

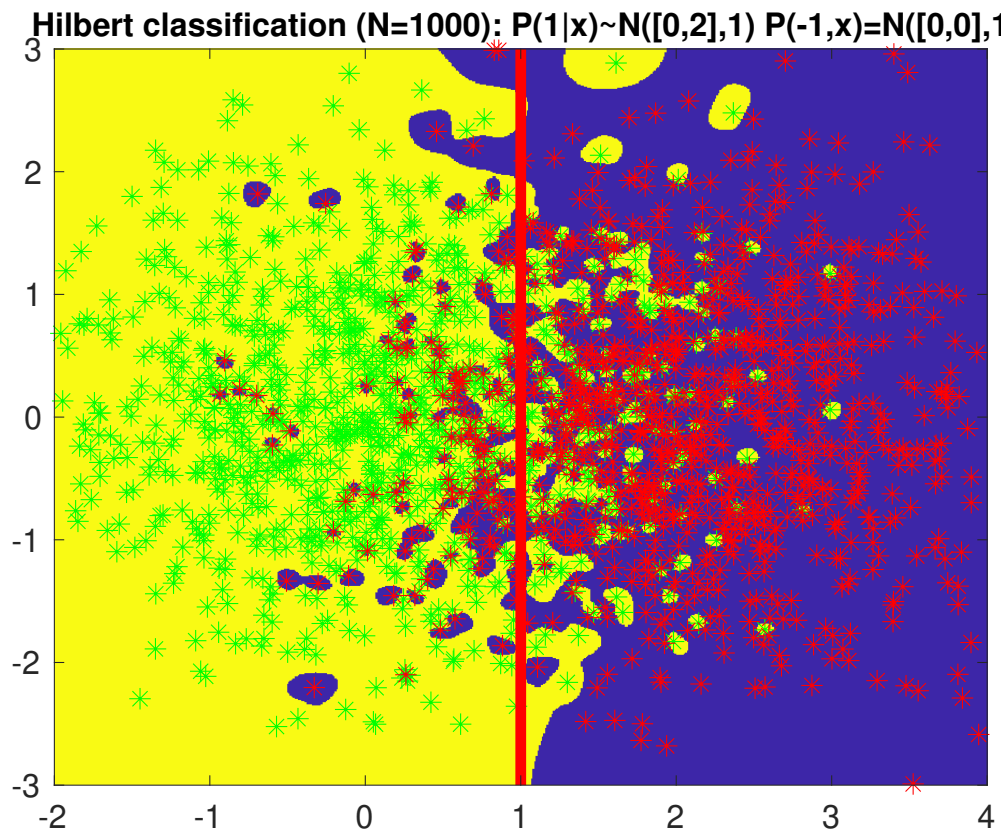

**Extended Data Fig. 1:** Classification using the Hilbert kernel: A simple example is shown, with two classes of points drawn from a mixture of 2D unit Normal distributions, with mean separated by 2. The points are shown in green and red colors (1000 points of each class). The red vertical line is the Bayes classification boundary. The yellow and blue colored regions are the Hilbert-predicted classification regions for the green and red points. The islands of blue in yellow (and vice versa) are due to the interpolative nature of the classifier, and correspond to the phenomenon of adversarial examples which are guaranteed for interpolating classifiers on noisy data.

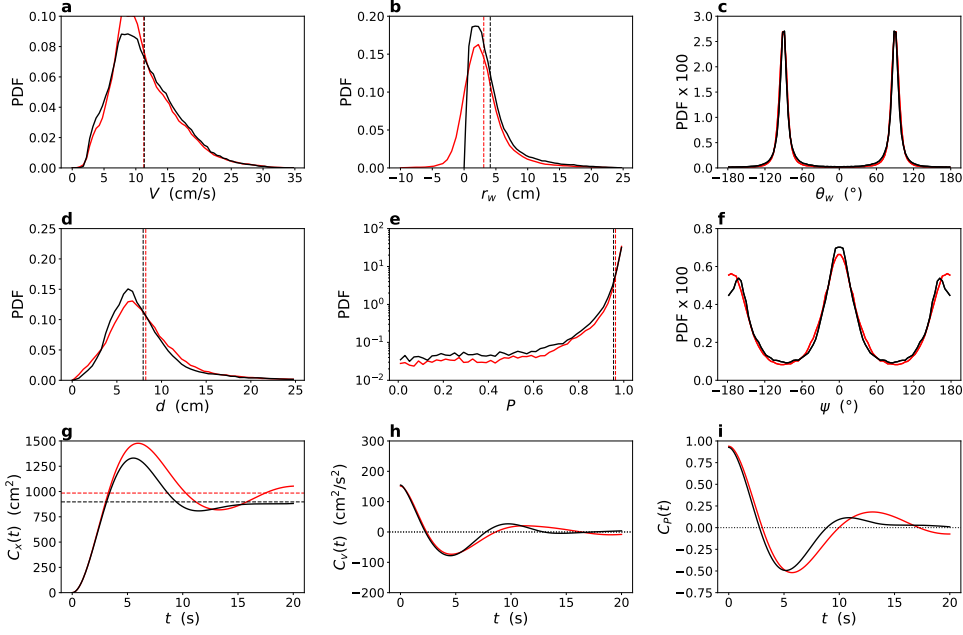

**Extended Data Fig. 2: Behavior of 2 Hilbert fish without the tank wall.** This figure is the analog of Fig. 3 in the main text (also for a memory  $M = 2$ ), but in the case where the presence of the tank wall is not enforced in the Hilbert model. The different panels show the 9 observables used to characterize the individual (**a-c**) and collective (**d-f**) behavior, and the time correlations in the system (**g-i**): **a**, PDF of the speed,  $V$ ; **b**, PDF of the distance to the wall,  $r_w$ ; **c**, PDF of the heading angle relative to the normal to the wall,  $\theta_w$ ; **d**, PDF of the distance between the pair of individuals,  $d$ ; **e**, PDF of the group polarization,  $P = |\cos(\Delta\phi/2)|$ , where  $\Delta\phi$  is the relative heading angle; **f**, PDF of the viewing angle at which an individual perceives the other individual,  $\psi$ . See Fig. 2a and b in the main text for a visual representation of the main variables. **g**, Mean squared displacement,  $C_x(t)$ , and its asymptotic limit,  $C_x(\infty) = 2\langle r^2 \rangle$  (dotted lines); **h**, Velocity autocorrelation,  $C_v(t)$ ; **i**, Polarization autocorrelation,  $C_P(t)$ . The black PDFs correspond to experiments, while the red PDFs correspond to the predictions of the Hilbert generative model. The plots are on the same scale as in Fig. 3 in the main text, except for  $r_w$ , for which the horizontal axis has been extended to negative values of  $r_w$  corresponding to instances where an individual is observed outside the limits of the experimental circular tank. Yet, the Hilbert fish spend 87% of the time strictly within the tank limits, and when they wander outside the tank, their average excursion distance from the wall is only 1.3 cm. These excursions are responsible for the upward and rightward shift of the peak of  $C_x(t)$  and for the larger asymptotic limit,  $C_x(\infty) = 2\langle r^2 \rangle \approx 980 \text{ cm}^2$  (compared to  $C_x(\infty) \approx 900 \text{ cm}^2$  for fish or for the Hilbert model implementing the rejection procedure enforcing the presence of the tank wall).

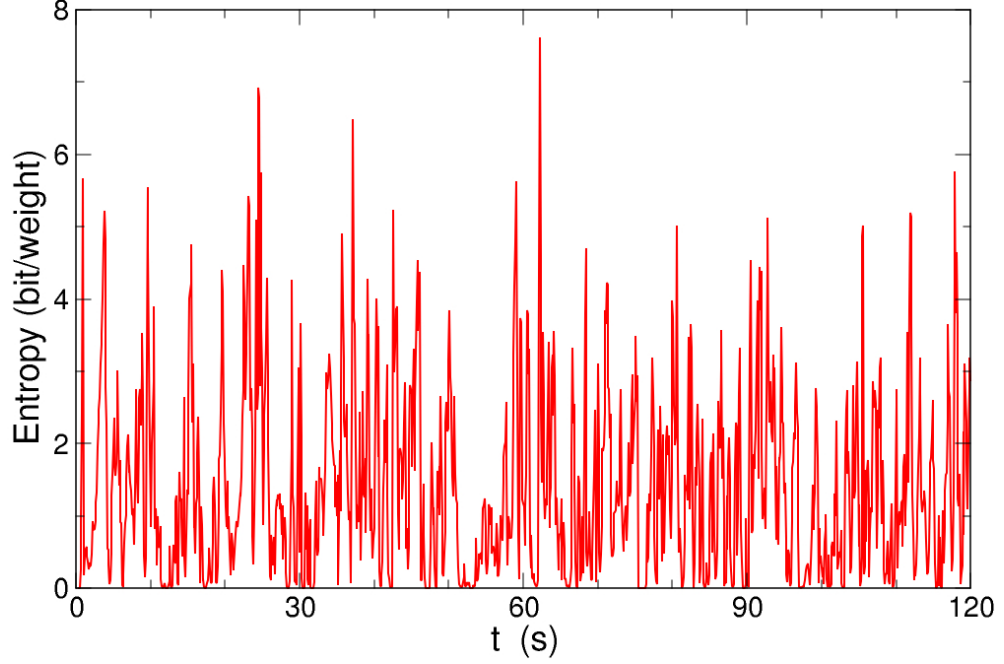

**Extended Data Fig. 3: Entropy time series for 2 Hilbert fish.** We plot a 2-minute time series of the entropy for 2 Hilbert fish, and for a memory  $M = 2$ . The entropy  $S$  can be interpreted as  $\log_2 \mathcal{N}$ , where  $\mathcal{N}$  is the effective number of real fish configurations used to predict the acceleration of the Hilbert fish. The time series exhibits short periods where  $\mathcal{N} \approx 1$  ( $S \approx 0$ ), when the Hilbert scheme has essentially selected a unique real fish configuration (“copying”). This short time series also presents three short periods when  $\mathcal{N} > 64$  ( $S > 6$ ). The PDF of the entropy computed over much longer time is shown in Extended Data Fig. 4.

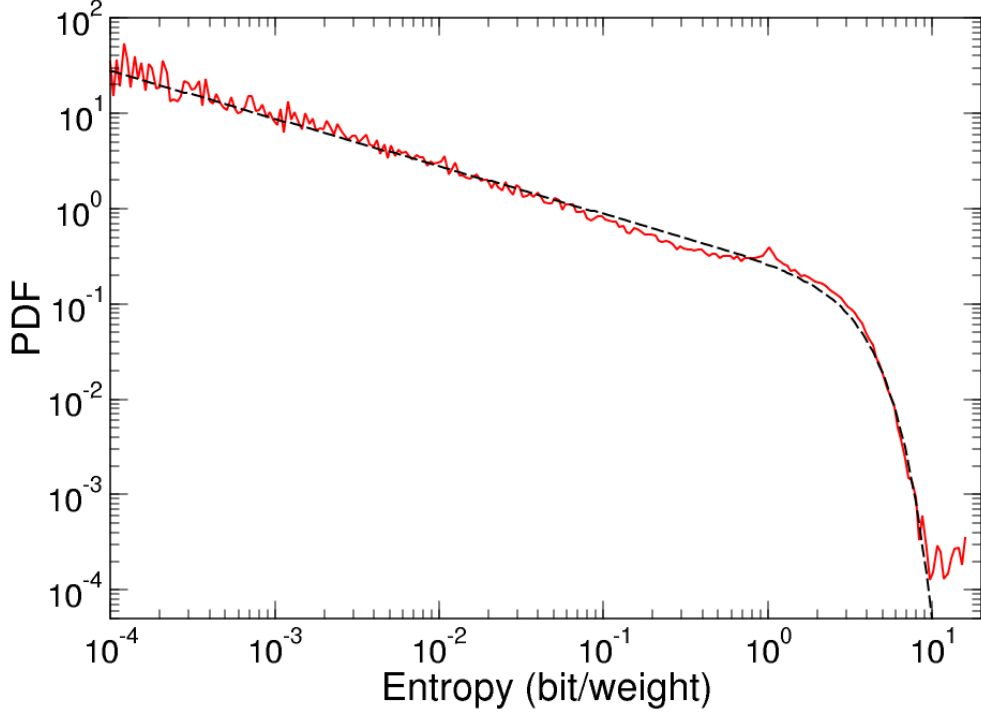

**Extended Data Fig. 4: Entropy distribution for 2 Hilbert fish.** We plot the PDF of the entropy for 2 Hilbert fish (for a memory  $M = 2$ ) resulting from an effective simulation time of 3 hours. The PDF of the entropy is reasonably well fitted by the normalized functional form  $\rho(S) = (2\Gamma[5/4])^{-1} (S_c S)^{-1/2} \exp(-(S/S_c)^2)$ , although the fit does not capture some outliers at  $S > 10$ . The fitted cut-off entropy scale,  $S_c \approx 3.61$ , corresponds to  $\mathcal{N}_c = 2^{S_c} \approx 12.2$  real fish configurations contributing to the acceleration prediction, while the mean entropy  $\langle S \rangle \approx 1.37$  corresponds to  $2^{\langle \log_2 \mathcal{N} \rangle} = 2^{\langle S \rangle} \approx 2.6$  configurations. The mean number of configurations used for a prediction is  $\langle \mathcal{N} \rangle = \langle 2^S \rangle$ , and is dominated by outliers. If this average is restrained to instance where  $S \leq 10$ , one finds  $\langle \mathcal{N} \rangle_{S \leq 10} \approx 5.2$  (our fit  $\rho(S)$  would predict  $\langle \mathcal{N} \rangle_{S \leq 10} \approx 4.7$ ), whereas the average including all data is  $\langle \mathcal{N} \rangle \approx 35$ . Also note the small peak in the PDF near  $S = 1$ , corresponding to  $\mathcal{N} = 2$  relevant configurations contributing almost equally to the Hilbert prediction. Yet, during the simulation, entropies as high as  $S \sim 15$  were recorded, corresponding to  $\mathcal{N} \sim 32768$  fish configurations effectively considered by the Hilbert kernel. Compared to  $k$ NN methods, the Hilbert interpolation scheme is hence able to adapt the effective number of used data for the prediction to the properties of the input vector. See also Extended Data Fig. 3 for a short time series of the entropy.

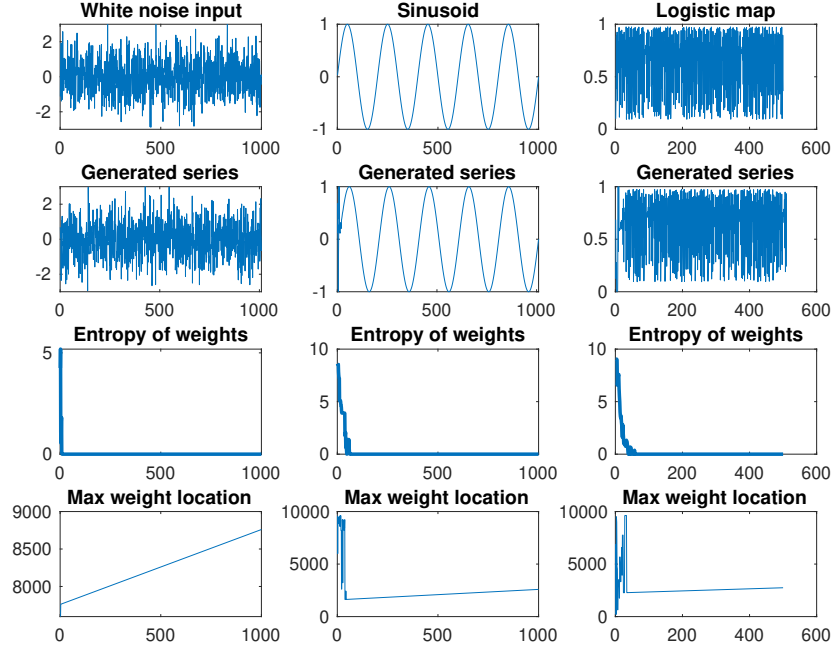

**Extended Data Fig. 5:** Autoregressive generative modeling of time series data: three examples are shown of signals generated by Eq. (9) with simple training data consisting of  $N=10000$  samples of a single training signal. The three columns respectively show results corresponding to a training signal generated by white Gaussian noise, a sinusoid, and iterates of a logistic regression equation  $x_{n+1} = \lambda x_n(1 - x_n)$  for  $\lambda = 3.9$ . A lag window size of  $T = 10$  is used (see the next figure for a lag window size of  $T = 40$ , and the signal generation is initiated by random initial conditions consisting of  $T$  samples of a standard normal distributed variable. The second row shows the generated signal. The third row shows the entropy of the generative weights as a function of generation time, and the fourth row shows the position of the maximum weight in the training signal, also as a function of generation time. Note the “copying” behavior, where the generated signal starts some fragment of the training signal after an initial transient. During the “copying” phase, the weight entropy falls to zero, and the index of the maximum weight increments linearly with time.

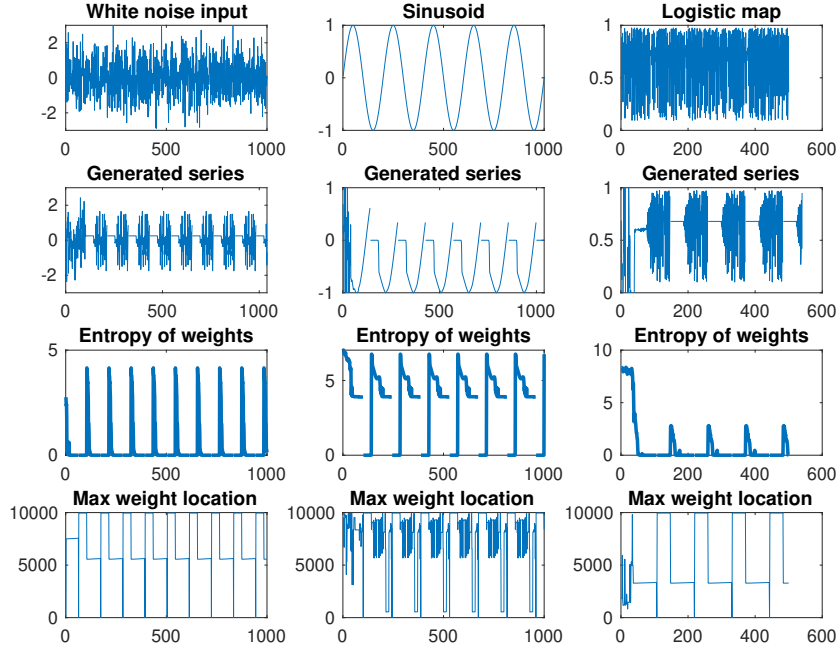

**Extended Data Fig. 6:** Autoregressive generative modeling of time series data: the same signal examples as in the previous extended data figure (Extended Data Fig. 5) are shown, this time with a lag window  $T = 40$ . In this case, periodic behavior is observed after an initial transient. The periods themselves contain short episodes of “copying” where the entropy falls to zero, and also show short episodes of close to fixed-point behavior of the dynamics, where the generated signal has an almost constant value. The extent of the “copying”, periodic or constant behaviors depends on the initial conditions as well as on  $d$ .

Hilbert with coordinate transformation

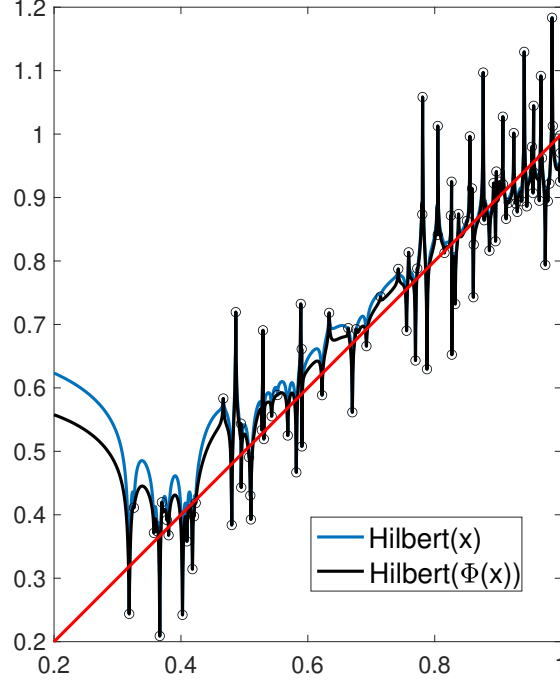

**Extended Data Fig. 7:** Impact of an initial coordinate transformation  $x \rightarrow \Phi(x)$ . This example shows two Hilbert kernel fits, with the black curve corresponding to the original kernel, and the blue curve corresponding to the generalized kernel corresponding to replacing  $x \rightarrow \Phi(x)$  in the weights. The samples  $x_i$  ( $i = 1..100$ ) are chosen so that the transformed coordinates  $\Phi(x_i)$  have a uniform distribution. The red line corresponds to  $y = x$  and uncorrelated Gaussian noise with  $\sigma = 0.1$  is added to produce the noisy samples. The two regression functions both interpolate, but show slight differences, especially in the data-sparse region, with the transformed weights (that produce uniform sampling of  $x$ ) being a bit closer to the noise-free function. As proven in the paper, both estimates are statistically consistent and have the same large-sample asymptotics in the leading order, but the sub-leading order behavior will generally depend on  $\Phi$  in conjunction with the other details of the problem.



## 1020 Appendix A Proofs of the theorems

### 1021 A.1 Preliminaries

1022 In the following,  $x \in \Omega^\circ$  so that  $\rho(x) > 0$ , and we will assume for simplicity that the  
1023 distribution  $\rho$  is continuous at  $x$ .

For the proof of our results, we will often exploit the following integral relation, valid for  $\beta > 0$  and  $z > 0$ ,

$$\frac{1}{\Gamma(\beta)} \int_0^{+\infty} t^{\beta-1} e^{-tz} dt = z^{-\beta}. \quad (\text{A1})$$

In addition, we define

$$\psi(x, t) := \int \rho(x + y) e^{-\frac{t}{\|y\|^d}} d^d y, \quad (\text{A2})$$

1024 which will play a central role. We note that  $\psi(x, 0) = 1$ , and that  $t \mapsto \psi(x, t)$  is a  
1025 continuous and strictly decreasing function of  $t$ . It is even infinitely differentiable at  
1026 any  $t > 0$ , but not necessarily at  $t = 0$ . In fact, for a fixed  $x$ , controlling the behavior  
1027 of  $1 - \psi(x, t)$  when  $t \rightarrow 0$  will be essential to obtain our results.

### 1028 A.2 Moments of the weights: large $n$ behavior

1029 In this section, we provide a complete proof of Theorem 1. Several other theorems will  
1030 use the same method of proof, and some basic steps will not be repeated in their proof.

Using Eq. (A1) for  $\beta > 0$ , we can express powers of the weight function as

$$w_0^\beta(x) = \frac{1}{\|x - x_0\|^{\beta d}} \frac{1}{\Gamma(\beta)} \int_0^{+\infty} t^{\beta-1} e^{-t\|x-x_0\|^{-d} - t \sum_{i=1}^n \|x-x_i\|^{-d}} dt. \quad (\text{A3})$$

By taking the expected value over the  $n+1$  independent random variables  $X_i$ , we obtain

$$\mathbb{E} [w_0^\beta(x)] = \frac{1}{\Gamma(\beta)} \int_0^{+\infty} t^{\beta-1} \psi^n(x, t) \phi_\beta(x, t) dt, \quad (\text{A4})$$

with

$$\phi_\beta(x, t) := \int \rho(x + y) \frac{e^{-\frac{t}{\|y\|^d}}}{\|y\|^{\beta d}} d^d y, \quad (\text{A5})$$

1031 which is also a strictly decreasing function of  $t$ , continuous at any  $t > 0$  (in fact,  
1032 infinitely differentiable for  $t > 0$ ).

1033 Note that the exchange of the integral over  $t$  and over  $\vec{x} = (x_0, x_1, \dots, x_n)$  used to  
1034 obtain Eq. (A4) is justified by the Fubini theorem, by first noting that the function  
1035  $\vec{x} \mapsto w_0^\beta(x) \prod_{i=0}^n \rho(x_i)$  is in  $L^1(\mathbb{R}^d)$ , since  $0 \leq w_0^\beta(x) \leq 1$ , and since  $\rho$  is obviously in  
1036  $L^1(\mathbb{R}^d)$ . Moreover, the function  $t \mapsto t^{\beta-1} \psi^n(x, t) \phi_\beta(x, t) > 0$  is also in  $L^1(\mathbb{R})$ . Indeed,

we will show below that it decays fast enough when  $t \rightarrow +\infty$  (see Eqs. (A7-A16)), ensuring the convergence of its integral at  $+\infty$ , and that it is bounded (and continuous) near  $t = 0$  (see Eqs. (A29-A34)), ensuring that this function is integrable at  $t = 0$ .

For  $\beta = 1$ ,  $\phi_1 = -\partial_t \psi$ , and we obtain  $\mathbb{E}[w_0(x)] = \frac{1}{n+1}$ , as expected. In the following, we first focus on the case  $\beta > 1$ , before addressing the cases  $0 < \beta < 1$  and  $\beta < 0$  at the very end of this section.

We now introduce  $t_1$  and  $t_2$  (to be further constrained later) such that  $0 < t_1 < t_2$ . We then express the integral of Eq. (A4) as the sum of corresponding integrals  $I_1 + I_{12} + I_2$ .  $I_1$  is the integral between 0 and  $t_1$ ,  $I_{12}$  the integral between  $t_1$  and  $t_2$ , and  $I_2$  the integral between  $t_2$  and  $+\infty$ . Thus, we have

$$I_1 \leq \mathbb{E}[w_0^\beta(x)] \leq I_1 + I_{12} + I_2, \quad (\text{A6})$$

provided these integral exists, which we will show below, by providing upper bounds for  $I_2$  and  $I_{12}$ , and tight lower and upper bound for the leading term  $I_1$ .

*Bound for  $I_2$*

For any  $R \geq 1$ , we can write the integral defining  $\psi(x, t)$

$$\psi(x, t) = \int_{\|y\| \leq R} + \int_{\|y\| \geq R} \quad (\text{A7})$$

$$\leq e^{-\frac{t}{R^d}} + \int_{\|y\| \geq R} \rho(x+y) \frac{\|y\|^2}{R^2} d^d y, \quad (\text{A8})$$

$$\leq e^{-\frac{t}{R^d}} + \frac{C_x}{R^2}, \quad (\text{A9})$$

with  $C_x = \sigma_\rho^2 + \|x - \mu_\rho\|^2$  depending on the mean  $\mu_\rho$  and variance  $\sigma_\rho^2$  of the distribution  $\rho$ . Similarly, for  $\phi_\beta(x, t)$ , we obtain the bound

$$\phi_\beta(x, t) \leq \frac{1}{R^{\beta d}} e^{-\frac{t}{R^d}} + \frac{C_x}{R^{2+\beta d}}, \quad (\text{A10})$$

valid for  $t \geq \max(1, \beta)$  and  $R \leq r_t$ , where  $r_t = (t/\beta)^{1/d} \geq 1$  is the location of the maximum of the function  $r \mapsto \frac{e^{-\frac{t}{r^d}}}{r^{\beta d}}$ .

We now set  $R = t^{\frac{s}{d}}$ , with  $0 < s < 1$ , and take  $T'_2 \geq \max(1, \beta, \beta^{1/(1-s)})$  (so that  $1 \leq R \leq r_t$ ) is large enough such that the following conditions are satisfied for  $t \geq t_2 \geq T'_2$ ,

$$e^{-\frac{t}{R^d}} = e^{-t^{1-s}} \leq \frac{C_x}{t^{\frac{2s}{d}}}, \quad (\text{A11})$$

$$\frac{1}{R^{\beta d}} e^{-\frac{t}{R^d}} = \frac{1}{t^{\beta s}} e^{-t^{1-s}} \leq \frac{C_x}{t^{\frac{2s}{d} + \beta s}}. \quad (\text{A12})$$

1052 Hence, for  $t \geq t_2 \geq T'_2$ , we obtain

$$\psi(x, t) \leq \frac{2C_x}{t^{\frac{2s}{d}}}, \quad (\text{A13})$$

$$\phi_\beta(x, t) \leq \frac{2C_x}{t^{\frac{2s}{d} + \beta s}}. \quad (\text{A14})$$

In addition, we also impose  $t_2 \geq T''_2 = (4C_x)^{d/(2s)}$ , so that  $\frac{2C_x}{t^{\frac{2s}{d}}} \leq \frac{1}{2}$ , for any  $t \geq T_2 = \max(T'_2, T''_2)$ . We can now exploit the resulting bounds for  $\psi(x, t)$  and  $\phi_\beta(x, t)$  in Eq. (A13) and Eq. (A14) to compute an explicit bound for  $I_2$ , for any given  $t_2 \geq T_2$ :

$$I_2 = \frac{1}{\Gamma(\beta)} \int_{t_2}^{+\infty} t^{\beta-1} \psi^n(x, t) \phi_\beta(x, t) dt \leq \frac{1}{\Gamma(\beta)} \int_{t_2}^{+\infty} t^{\beta(1-s)-1} \left( \frac{2C_x}{t^{\frac{2s}{d}}} \right)^{n+1} dt. \quad (\text{A15})$$

The integral in the right-hand side of Eq. (A15) only converges for  $s > \frac{1}{1 + \frac{2(n+1)}{\beta d}}$  (remember that we also impose  $s < 1$ ), and we then set  $s = \frac{1}{1 + \frac{2}{\beta d}}$ , which ensures its convergence for any  $n \geq 1$ . Performing this integral and using the fact that  $\frac{2C_x}{t_2^{\frac{2s}{d}}} \leq \frac{1}{2}$ , we finally obtain

$$I_2 \leq C_x \frac{d + \frac{2}{\beta}}{\Gamma(\beta)} \times \frac{1}{n 2^n}. \quad (\text{A16})$$

1053 We hence obtain the convergence of  $I_2$ , which, along with the bounds for  $I_1$  and  $I_{12}$   
 1054 below, justifies our use of Fubini theorem to obtain Eq. (A4). Note that the above  
 1055 bound essentially decays exponentially with  $n$ , under the stated conditions.

1056 *Bound for  $I_{12}$*

Again, exploiting the fact that  $\psi(x, t)$  and  $\phi_\beta(x, t)$  are strictly decreasing functions of  $t$ , we obtain

$$I_{12} \leq \frac{\phi_\beta(x, t_1) t_2^\beta}{\Gamma(\beta)} \times \psi^n(x, t_1), \quad (\text{A17})$$

1057 where we note that  $\psi(x, t_1) < 1$ , for any  $t_1 > 0$ , implying that this bound decays  
 1058 exponentially with  $n$ .

1059 *Bound for  $I_1$*

1060 We first want to obtain bounds for  $1 - \psi(x, t)$ , where  $0 \leq t \leq t_1$ , with  $t_1 > 0$  to be  
 1061 constrained below. In addition, exploiting the continuity of  $\rho$  at  $x$  and the fact that  
 1062  $\rho(x) > 0$ , we introduce  $\varepsilon$  satisfying  $0 < \varepsilon < 1/4$ , and define  $\lambda > 0$  small enough so that  
 1063 the ball  $B(x, \delta) \subset \Omega^\circ$ , and  $\|y\| \leq \lambda \implies |\rho(x+y) - \rho(x)| \leq \varepsilon \rho(x)$ . Exploiting this  
 1064 definition, we obtain the following lower and upper bounds

$$1 - \psi(x, t) \geq (1 - \varepsilon) \rho(x) \int_{\|y\| \leq \lambda} \left( 1 - e^{-\frac{t}{\|y\|^d}} \right) d^d y, \quad (\text{A18})$$

$$1 - \psi(x, t) \leq (1 + \varepsilon)\rho(x) \int_{\|y\| \leq \lambda} \left(1 - e^{-\frac{t}{\|y\|^d}}\right) d^d y \quad (\text{A19})$$

$$+ \int_{\|y\| \geq \lambda} \rho(x + y) \left(1 - e^{-\frac{t}{\lambda^d}}\right) d^d y, \quad (\text{A20})$$

$$\leq (1 + \varepsilon)\rho(x) \int_{\|y\| \leq \lambda} \left(1 - e^{-\frac{t}{\|y\|^d}}\right) d^d y + \frac{t}{\lambda^d}. \quad (\text{A21})$$

1065 The integral appearing in these bounds can be simplified by using radial coordinates:

$$\int_{\|y\| \leq \lambda} \left(1 - e^{-\frac{t}{\|y\|^d}}\right) d^d y = S_d \int_0^\lambda \left(1 - e^{-\frac{t}{r^d}}\right) r^{d-1} dr, \quad (\text{A22})$$

$$= V_d t \int_{\frac{t}{\lambda^d}}^{+\infty} \frac{1 - e^{-u}}{u^2} du, \quad (\text{A23})$$

1066 where  $S_d$  and  $V_d = \frac{S_d}{d}$  are respectively the surface and the volume of the  $d$ -dimensional  
1067 unit sphere, and we have used the change of variable  $u = \frac{t}{r^d}$ .

We note that for  $0 < z \leq 1$ , we have

$$\int_z^{+\infty} \frac{1 - e^{-u}}{u^2} du = -\ln(z) + \int_z^1 \frac{1 - u - e^{-u}}{u^2} du + \int_1^{+\infty} \frac{1 - e^{-u}}{u^2} du. \quad (\text{A24})$$

1068 Exploiting this result and now imposing  $t_1 \leq \lambda^d$ , we have, for any  $t \leq t_1$

$$\ln\left(\frac{C_-}{t}\right) \leq \int_{\frac{t}{\lambda^d}}^{+\infty} \frac{1 - e^{-u}}{u^2} du \leq \ln\left(\frac{C_+}{t}\right), \quad (\text{A25})$$

$$\ln(C_+) = d \ln(\lambda) + \int_1^{+\infty} \frac{1 - e^{-u}}{u^2} du, \quad (\text{A26})$$

$$\ln(C_-) = \ln(C_+) + \int_0^1 \frac{1 - u - e^{-u}}{u^2} du. \quad (\text{A27})$$

Combining these bounds with Eq. (A18) and Eq. (A21), we have shown the existence of two  $x$ -dependent constants  $D_\pm$  such that, for  $0 \leq t \leq t_1 \leq \lambda^d$ , we have

$$(1 - \varepsilon)V_d \rho(x) t \ln\left(\frac{D_-}{t}\right) \leq 1 - \psi(x, t) \leq (1 + \varepsilon)V_d \rho(x) t \ln\left(\frac{D_+}{t}\right). \quad (\text{A28})$$

1069 In addition, we will also choose  $t_1 < D_\pm/3$ , such that the two functions  $t \ln\left(\frac{D_\pm}{t}\right)$  are  
1070 positive and strictly increasing for  $0 \leq t \leq t_1$ .  $t_1$  is also taken small enough such that  
1071 the two bounds in Eq. (A28) are always less than  $1/2$ , for  $0 \leq t \leq t_1$  (both bounds  
1072 vanish when  $t \rightarrow 0$ ).

1073 We now obtain efficient bounds for  $\phi_\beta(x, t)$ , for  $0 \leq t \leq t_1$ . Proceeding similarly as  
 1074 above, we obtain

$$\phi_\beta(x, t) \geq (1 - \varepsilon)\rho(x) \int_{\|y\| \leq \lambda} \frac{e^{-\frac{t}{\|y\|^d}}}{\|y\|^{\beta d}} d^d y, \quad (\text{A29})$$

$$\phi_\beta(x, t) \leq (1 + \varepsilon)\rho(x) \int_{\|y\| \leq \lambda} \frac{e^{-\frac{t}{\|y\|^d}}}{\|y\|^{\beta d}} d^d y + \frac{1}{\lambda^{\beta d}}. \quad (\text{A30})$$

Again, the integral appearing in these bounds can be rewritten as

$$\int_{\|y\| \leq \lambda} \frac{e^{-\frac{t}{\|y\|^d}}}{\|y\|^{\beta d}} d^d y = S_d \int_0^\lambda r^{d(1-\beta)-1} e^{-\frac{t}{r^d}} dr. \quad (\text{A31})$$

1075 For  $0 < \beta < 1$ , the integral of Eq. (A31) is finite for  $t = 0$ , ensuring the existence of  
 1076  $\phi_\beta(x, 0)$  and the fact that  $t \mapsto t^{\beta-1}\psi(x, t)\phi_\beta(x, t)$  belongs to  $L^1(\mathbb{R})$  (hence, justifying  
 1077 our use of Fubini theorem for  $0 < \beta < 1$ ). For  $\beta > 1$ , we have

$$\int_{\|y\| \leq \lambda} \frac{e^{-\frac{t}{\|y\|^d}}}{\|y\|^{\beta d}} d^d y = V_d t^{1-\beta} \int_{\frac{t}{\lambda^d}}^{+\infty} u^{\beta-2} e^{-u} du. \quad (\text{A32})$$

$$\underset{t \rightarrow 0}{\sim} V_d \Gamma(\beta - 1) t^{1-\beta}. \quad (\text{A33})$$

This integral diverges when  $t \rightarrow 0$  and the constant term  $\lambda^{-\beta d}$  in Eq. (A30) can be made as small as necessary (by a factor less than  $\varepsilon$ ) compared to this leading integral term, for a small enough  $t_1$ . Similarly, we can choose  $t_1$  small enough so that the integral Eq. (A31) is approached by the asymptotic result of Eq. (A33) up to a factor  $\varepsilon$ . Thus, we find that for  $0 \leq t \leq t_1$ , one has

$$(1 - 2\varepsilon)V_d\rho(x)\Gamma(\beta - 1)t^{1-\beta} \leq \phi_\beta(x, t) \leq (1 + 3\varepsilon)V_d\rho(x)\Gamma(\beta - 1)t^{1-\beta}. \quad (\text{A34})$$

1078 This shows that  $t^{\beta-1}\phi_\beta(x, t)$  has a smooth limit equal to  $V_d\rho(x)\Gamma(\beta - 1)$ , when  $t \rightarrow 0$ ,  
 1079 so that, combined with the finite upper bound for  $I_2$ ,  $t \mapsto t^{\beta-1}\psi(x, t)\phi_\beta(x, t)$  belongs  
 1080 to  $L^1(\mathbb{R})$ , for  $\beta > 1$ , and hence for all  $\beta > 0$ . Hence, the use of the Fubini theorem to  
 1081 derive Eq. (A4) has been justified.

1082 Now combining the bounds for  $\psi(x, t)$  and  $\phi_\beta(x, t)$ , we obtain

$$I_1 \geq (1 - 2\varepsilon)\frac{1}{\beta - 1}V_d\rho(x) \int_0^{t_1} \left(1 - (1 + \varepsilon)V_d\rho(x)t \ln\left(\frac{D_+}{t}\right)\right)^n dt, \quad (\text{A35})$$

$$I_1 \leq (1 + 3\varepsilon)\frac{1}{\beta - 1}V_d\rho(x) \int_0^{t_1} \left(1 - (1 - \varepsilon)V_d\rho(x)t \ln\left(\frac{D_-}{t}\right)\right)^n dt. \quad (\text{A36})$$

1083 *Asymptotic behavior of  $I_1$  and  $\mathbb{E}\left[w_0^\beta(x)\right]$*

We will show below that

$$\int_0^{t_1} \left(1 - E_{\pm} t \ln \left(\frac{D_{\pm}}{t}\right)\right)^n dt \underset{n \rightarrow +\infty}{\sim} \frac{1}{E_{\pm} n \ln(n)}, \quad (\text{A37})$$

where  $E_{\pm} = (1 \mp \varepsilon) V_d \rho(x)$ . For a given  $x$ , and for  $t_1$  and  $t_2$  satisfying the requirements mentioned above, the upper bounds for  $I_{12}$  (see Eq. (A17)) and  $I_2$  (see Eq. (A16)) appearing in Eq. (A6) both decay exponentially with  $n$  and can hence be made arbitrarily small compared to  $I_1$  which decays as  $1/(n \ln(n))$ .

Finally, assuming for now the result of Eq. (A37) (to be proven below), we have obtained the exact asymptotic result

$$\mathbb{E} \left[ w_0^{\beta}(x) \right] \underset{n \rightarrow +\infty}{\sim} \frac{1}{(\beta - 1) n \ln(n)}. \quad (\text{A38})$$

*Proof of Eq. (A37)*

We are then left to prove the result of Eq. (A37). First, we will use the fact that, for  $0 \leq z \leq z_1 < 1$ , one has

$$e^{-\mu z} \leq 1 - z \leq e^{-z}, \quad (\text{A39})$$

where  $\mu = -\ln(1 - z_1)/z_1$ . We can apply this result to the integral of Eq. (A37), using  $z_1^{\pm} = E_{\pm} t_1 \ln(D_{\pm}/t_1) > 0$ . Note that  $0 < t_1 < D_{\pm}/3$  and hence  $z_1^{\pm} > 0$  can be made as close to 0 as desired, and the corresponding  $\mu_{\pm} > 1$  can be made as close to 1 as desired. Thus, in order to prove Eq. (A37), we need to prove the following equivalent

$$I_n = \int_0^{t_1} e^{-n E t \ln(\frac{D}{t})} dt \underset{n \rightarrow +\infty}{\sim} \frac{1}{E n \ln(n)}, \quad (\text{A40})$$

for an integral of the form appearing in Eq. (A40). Let us mention again that  $t_1$  has been taken small enough so that the function  $t \mapsto t \ln(\frac{D}{t})$  is positive and strictly increasing (with its maximum at  $t_{\max} = D/e < t_1$ ), for  $0 \leq t \leq t_1$ .

We now take  $n$  large enough so that  $\frac{\ln(n)}{n} < t_1$  and  $E \ln(n) > 1$ . One can then write

$$I_n = \frac{1}{n} \int_0^{\ln(n)} e^{-E u \ln(\frac{Dn}{u})} du + \int_{\frac{\ln(n)}{n}}^{t_1} e^{-n E t \ln(\frac{D}{t})} dt = J_n + K_n, \quad (\text{A41})$$

$$J_n \leq \frac{1}{n} \int_0^{1/E} e^{-E u \ln(D E n)} du + \frac{1}{n} \int_{1/E}^{\ln(n)} e^{-E u \ln(\frac{Dn}{\ln(n)})} du, \quad (\text{A42})$$

$$\leq \frac{1}{E n \ln(D E n)} + \frac{\ln(n)}{D E n^2 \ln\left(\frac{Dn}{\ln(n)}\right)}, \quad (\text{A43})$$

$$K_n \leq \int_{\frac{\ln(n)}{n}}^{+\infty} e^{-n E t \ln(\frac{D}{t_1})} dt \leq \frac{1}{E n^{1+E \ln(\frac{D}{t_1})} \ln\left(\frac{D}{t_1}\right)}. \quad (\text{A44})$$

When  $n \rightarrow +\infty$ , we hence find that the upper bound  $I_n^+$  of  $I_n$  satisfies

$$I_n^+ \underset{n \rightarrow +\infty}{\sim} \frac{1}{E n \ln(DEn)} \underset{n \rightarrow +\infty}{\sim} \frac{1}{E n \ln(n)}. \quad (\text{A45})$$

1093 Let us now prove a similar result for a lower bound of  $I_n$  by considering  $n$  large  
1094 enough so that  $nEt_1 > 1$ , and by introducing  $\delta$  satisfying  $0 \leq \delta < 1/e$ :

$$I_n = \frac{1}{nE} \int_0^{nEt_1} e^{-u \ln(DEn) + u \ln(u)} du, \quad (\text{A46})$$

$$\geq \frac{1}{nE} \int_0^\delta e^{-u \ln(DEn) + \delta \ln(\delta)} du, \quad (\text{A47})$$

$$\geq \frac{e^{\delta \ln(\delta)}}{nE \ln(DEn)} \left(1 - (DEn)^{-\delta}\right) = I_n^-(\delta). \quad (\text{A48})$$

Hence, for any  $0 \leq \delta < 1/e$  which can be made arbitrarily small, and for  $n$  large enough, we find that  $I_n \geq I_n^-(\delta)$ , with

$$I_n^-(\delta) \sim \frac{e^{\delta \ln(\delta)}}{E n \ln(DEn)} \sim \frac{e^{\delta \ln(\delta)}}{E n \ln(n)}. \quad (\text{A49})$$

1095 Eq. (A49) combined with the corresponding result of Eq. (A45) for the upper bound  $I_n^+$   
1096 finally proves Eq. (A40), and ultimately, Eq. (A38) and Theorem 1 for the asymptotic  
1097 behavior of the moment  $\mathbb{E}[w_0^\beta(x)]$ , for  $\beta > 1$ .

1098 *Entropy* (moment for “ $\beta = 1^-$ ”)

We define the information entropy,  $S(x)$ , by

$$S(x) = - \sum_{i=0}^n w_i(x) \log[w_i(x)]. \quad (\text{A50})$$

If the weights are equidistributed over  $\mathcal{N}$  data, one obtains  $S = -\mathcal{N} \times 1/\mathcal{N} \log(1/\mathcal{N}) = \log(\mathcal{N})$ , and  $e^S = \mathcal{N}$  indeed represents the number of contributing data. The expectation value of the entropy reads

$$\mathbb{E}[S(x)] = -(n+1) \mathbb{E}[w_0(x) \ln(w_0(x))]. \quad (\text{A51})$$

In order to evaluate Eq. (A51), we use an integral representation in the spirit of Eq. (A1), valid for any  $z > 0$ ,

$$\int_0^{+\infty} (\ln(t) + \gamma) e^{-tz} dt = -\frac{\ln(z)}{z}, \quad (\text{A52})$$

1099 where  $\gamma$  is Euler's constant. Using Eq. (A52), we find

$$\begin{aligned} -w_0(x) \ln(w_0(x)) &= -\frac{1}{\|x - x_0\|^{-d}} \int_0^{+\infty} e^{-t \|x - x_0\|^{-d} - t \sum_{i=1}^n \|x - x_i\|^{-d}} \\ &\quad \times \left( \ln(\|x - x_0\|^{-d}) + \ln(t) + \gamma \right) dt. \end{aligned} \quad (\text{A53})$$

By taking the expected value over the  $n+1$  independent random variables  $X_i$ , we obtain

$$\mathbb{E} [-w_0(x) \ln(w_0(x))] = - \int_0^{+\infty} \psi^n(x, t) \left( \Phi_1(x, t) + (\ln(t) + \gamma) \phi_1(x, t) \right) dt, \quad (\text{A54})$$

with

$$\Phi_1(x, t) := \int \rho(x + y) e^{-\frac{t}{\|y\|^d}} \frac{\ln(\|y\|^{-d})}{\|y\|^d} d^d y, \quad (\text{A55})$$

1100 which is continuous at any  $t > 0$  (in fact, infinitely differentiable for  $t > 0$ ). In addition,  
1101  $\phi_1(x, t) = -\partial_t \psi(x, t)$  has been defined in Eq. (A5).

1102 By exploiting the same method used to bound  $\phi_\beta(x, t)$  (see Eq. (A34) and above  
1103 it), we find that

$$\Phi_1(x, t) \underset{t \rightarrow 0}{\sim} \frac{1}{2} V_d \rho(x) \ln^2(t), \quad (\text{A56})$$

$$\phi_1(x, t) \underset{t \rightarrow 0}{\sim} -V_d \rho(x) \ln(t), \quad (\text{A57})$$

1104 where Eq. (A57) is fully consistent with Eq. (A28) (by naively differentiating Eq. (A28)).

1105 Finally, exploiting Eqs. (A56, A57), the integral of Eq. (A54) can be evaluated with  
1106 the same method as in the previous section, leading to

$$\mathbb{E} [-w_0(x) \ln(w_0(x))] \underset{n \rightarrow +\infty}{\sim} \frac{1}{2} V_d \rho(x) \int_0^{t_1} e^{-n V_d \rho(x) t \ln\left(\frac{D_\pm}{t}\right)} \ln^2(t) dt, \quad (\text{A58})$$

$$\underset{n \rightarrow +\infty}{\sim} \frac{1}{2} \frac{\ln(n)}{n}. \quad (\text{A59})$$

This last result proves the second part of Theorem 1 (see also the heuristic discussion below Theorem 1) for the expected value of the entropy:

$$\mathbb{E}[S(x)] = -(n+1) \mathbb{E}[w_0(x) \ln(w_0(x))] \underset{n \rightarrow +\infty}{\sim} \frac{1}{2} \ln(n). \quad (\text{A60})$$

1107 *Moments of order  $0 < \beta < 1$*

The integral representation Eq. (A1) allows us to also explore moments of order  $0 < \beta < 1$ . In that case  $\kappa_\beta(x) = \phi_\beta(x, 0) < \infty$  is finite, with

$$\kappa_\beta(x) = \int \frac{\rho(x + y)}{\|y\|^{\beta d}} d^d y. \quad (\text{A61})$$



1108 By retracing the different steps of our proof in the case  $\beta > 1$ , it is straightforward  
 1109 to show that

$$\mathbb{E} \left[ w_0^\beta(x) \right] \underset{n \rightarrow +\infty}{\sim} \frac{\kappa_\beta(x)}{\Gamma(\beta)} \int_0^{t_1} t^{\beta-1} e^{-nV_d\rho(x)t \ln\left(\frac{D_\pm}{t}\right)} dt, \quad (\text{A62})$$

$$\underset{n \rightarrow +\infty}{\sim} \frac{\kappa_\beta(x)}{(V_d\rho(x)n \ln(n))^\beta}, \quad (\text{A63})$$

1110 where the equivalent for the integral can be obtained by exploiting the very same  
 1111 method used in our proof of Eq. (A37) above, hence proving the third part of Theorem 1.

1112 We observe that contrary to the universal result of Eq. (A38) for  $\beta$ , the asymptotic  
 1113 equivalent for the moment of order  $0 < \beta < 1$  is non-universal and explicitly depends  
 1114 on  $x$  and the distribution  $\rho$ .

1115 *Moments of order  $\beta < 0$*

1116 Finally, moments of order  $\beta < 0$  are unfortunately inaccessible to our methods  
 1117 relying on the integral relation Eq. (A1), which imposes  $\beta > 0$ . However, we can obtain  
 1118 a few rigorous results for these moments (see also the heuristic discussion just after  
 1119 Theorem 1).

Indeed, for  $\beta = -1$ , we have

$$\frac{1}{w_0(x)} = 1 + \|x - x_0\|^d \sum_{i=1}^n \frac{1}{\|x - x_i\|^d}. \quad (\text{A64})$$

1120 But since we have assumed that  $\rho(x) > 0$ ,  $\mathbb{E}[\|x - x_i\|^{-d}] = \int \frac{\rho(x+y)}{\|y\|^d} d^d y$  is infinite and  
 1121 moments of order  $\beta \leq -1$  are definitely not defined.

As for the moment of order  $-1 < \beta < 0$ , it can be easily bounded,

$$\mathbb{E} \left[ w_0^\beta(x) \right] \leq 1 + n \int \rho(x+y) \|y\|^{|\beta|d} d^d y \int \frac{\rho(x+y)}{\|y\|^{|\beta|d}} d^d y, \quad (\text{A65})$$

1122 and a sufficient condition for its existence is  $\kappa_\beta(x) = \int \rho(x+y) \|y\|^{|\beta|d} d^d y < \infty$  (the  
 1123 other integral, equal to  $\kappa_{|\beta|}(x)$ , is always finite for  $|\beta| < 1$ ), which proves the last part  
 1124 of Theorem 1.

1125 *Numerical distribution of the weights*

In the main text below Theorem 1, we presented a heuristic argument showing that  
 the results of Theorem 1 and Theorem 2 (for the Lagrange function; that we prove  
 below) were fully consistent with the weight  $W = w_0(x)$  having a long-tailed scaling  
 distribution,

$$P_n(W) = \frac{1}{W_n} p\left(\frac{W}{W_n}\right). \quad (\text{A66})$$

1126 The scaling function  $p$  was shown to have a universal tail  $p(w) \sim w^{-2}$  and the scale  
 1127  $W_n$  was shown to obey the equation  $-W_n \ln(W_n) = n^{-1}$ . To the leading order for  
 1128 large  $n$ , we have  $W_n \sim \frac{1}{n \ln(n)}$ , and we can solve this equation recursively to find the

1129 next order approximation,  $W_n \sim \frac{1}{n \ln(n \ln(n))}$ . In Fig. 1b in the main text, we present  
 1130 numerical simulations for the scaling distribution  $p$  of the variable  $w = W/W_n$ , for  
 1131  $n = 65536$ , using the estimate  $W_n \approx \frac{1}{n \ln(n \ln(n))}$ . We observe that  $p(w)$  is very well  
 1132 approximated by the function  $\hat{p}(w) = \frac{1}{(1+w)^2}$ , confirming our non-rigorous results.

1133 The data were generated by drawing random values of  $r_i^d = \|x - x_i\|^d$  using  
 1134  $(n+1)$  *i.i.d.* random variables  $a_i$  uniformly distributed in  $[0, 1[$ , with the relation  
 1135  $r_i = [a_i/(1-a_i)]^{1/d}$ , and by computing the resulting weight  $W = r_i^{-d} / \sum_{j=0}^n r_j^{-d}$ . This  
 1136 corresponds to a distribution of  $\|x - x_i\|$  given by  $\rho(x - x_i) = 1/V_d/(1 + \|x - x_i\|^d)^2$ .

### 1137 A.3 Lagrange function: scaling limit

In this section, we prove Theorem 2 for the scaling limit of the Lagrange function  $L_0(x) = \mathbb{E}_{X|x_0}[w_0(x)]$ . Exploiting again Eq. (A1), the expected Lagrange function can be written as

$$L_0(x) = \|x - x_0\|^{-d} \int_0^{+\infty} \psi^n(x, t) e^{-t\|x-x_0\|^{-d}} dt, \quad (\text{A67})$$

1138 where  $\psi(x, t)$  is again given by Eq. (A2).

For a given  $t_1 > 0$ , and remembering that  $\psi(x, t)$  is a strictly decreasing function of  $t$ , with  $\psi(x, 0) = 1$ , we obtain

$$L_1 \leq L_0(x) \leq L_1 + L_2, \quad (\text{A68})$$

1139 with

$$L_1 = \|x - x_0\|^{-d} \int_0^{t_1} \psi^n(x, t) e^{-t\|x-x_0\|^{-d}} dt, \quad (\text{A69})$$

$$L_2 = e^{-t_1\|x-x_0\|^{-d}}. \quad (\text{A70})$$

1140 For  $\varepsilon > 0$  and a sufficiently small  $t_1 > 0$  (see section A.2), we can use the bound  
 1141 for  $\psi(x, t)$  obtained in section A.2, to obtain

$$L_1 \geq (1 - 2\varepsilon) \frac{1}{\|x - x_0\|^d} \int_0^{t_1} \left( 1 - (1 + \varepsilon) V_d \rho(x) t \ln \left( \frac{D_+}{t} \right) \right)^n e^{-\frac{t}{\|x-x_0\|^d}} dt \quad (\text{A71})$$

$$L_1 \leq (1 + 3\varepsilon) \frac{1}{\|x - x_0\|^d} \int_0^{t_1} \left( 1 - (1 - \varepsilon) V_d \rho(x) t \ln \left( \frac{D_-}{t} \right) \right)^n e^{-\frac{t}{\|x-x_0\|^d}} dt \quad (\text{A72})$$

Then, proceeding exactly as in section A.2, it is straightforward to show that  $L_1$  can be bounded (up to factors  $1 + O(\varepsilon)$ ) by the two integrals  $L_1^\pm$

$$L_1^\pm = \frac{1}{\|x - x_0\|^d} \int_0^{t_1} e^{-n V_d \rho(x) t \ln \left( \frac{D_\pm}{t} \right) - \frac{t}{\|x-x_0\|^d}} dt. \quad (\text{A73})$$

1142 Like in section A.2, we impose  $t_1 < D_\pm/3$ , such that the two functions  $t \ln \left( \frac{D_\pm}{t} \right)$  are  
 1143 positive and strictly increasing for  $0 \leq t \leq t_1$ .

We now introduce the scaling variable  $z_x(n, x_0) = V_d \rho(x) \|x - x_0\|^d n \log(n)$ , so that

$$L_1^\pm = \frac{1}{\|x - x_0\|^d} \int_0^{t_1} e^{-\frac{t}{\|x - x_0\|^d} \left(1 + z \frac{\ln(D_\pm/t)}{\ln(n)}\right)} dt = \int_0^{\frac{t_1}{\|x - x_0\|^d}} e^{-u \left(1 + z \frac{\ln(D_\pm \|x - x_0\|^{-d}/u)}{\ln(n)}\right)} du, \quad (\text{A74})$$

where we have used the shorthand notation  $z \equiv z_x(n, x_0)$ .

For a given real  $Z \geq 0$ , we now want to study the (scaling) limit of  $L_0(x)$  when  $n \rightarrow \infty$ ,  $\|x - x_0\|^{-d} \rightarrow +\infty$  (i.e.,  $x_0 \rightarrow x$ ), and such that  $z_x(n, x_0) \rightarrow Z$ , which we will simply denote  $\lim_Z L_0(x)$ . We note that  $\lim_Z L_2 = 0$  (see Eq. (A68) and Eq. (A70)), so that we are left to show that  $\lim_Z L_1^\pm = \frac{1}{1+Z} = \lim_Z L_0(x)$ , which will prove Theorem 2.

Exploiting the fact that  $u \ln(u) \geq -1/e$ , for  $u \geq 0$ , we obtain

$$L_1^\pm \geq e^{-\frac{z}{e \ln(n)}} \int_0^{\frac{t_1}{\|x - x_0\|^d}} e^{-u \left(1 + z \frac{\ln(D_\pm \|x - x_0\|^{-d})}{\ln(n)}\right)} du, \quad (\text{A75})$$

$$\geq \frac{1}{1 + z \frac{\ln(D_\pm \|x - x_0\|^{-d})}{\ln(n)}} e^{-\frac{z}{e \ln(n)}} \left(1 - e^{-\frac{t_1}{\|x - x_0\|^d}}\right). \quad (\text{A76})$$

Since we have  $\lim_Z \frac{\ln(D_\pm \|x - x_0\|^{-d})}{\ln(n)} = 1$ ,  $\lim_Z \frac{z}{e \ln(n)} = 0$ , and  $\lim_Z \frac{t_1}{\|x - x_0\|^d} = +\infty$ , we find that  $L_1^\pm$  is bounded from below by a term for which the  $\lim_Z$  is  $\frac{1}{1+Z}$ , with a relative difference of order  $1/\ln(n)$  for finite  $n$ .

Since we will ultimately take the  $\lim_Z$  and hence the limit  $x_0 \rightarrow x$ , we can impose that the upper limit of the last integral in Eq. (A74) satisfies  $\frac{t_1}{\|x - x_0\|^d} > 1$ . Let us now consider  $K > 0$ , such that  $K < \frac{t_1}{\|x - x_0\|^d}$ . We then obtain,

$$L_1^\pm \leq \int_0^K e^{-u \left(1 + z \frac{\ln(D_\pm \|x - x_0\|^{-d}/K)}{\ln(n)}\right)} du + \int_K^{+\infty} e^{-u} du, \quad (\text{A77})$$

$$\leq \frac{1}{1 + z \frac{\ln(D_\pm \|x - x_0\|^{-d}/K)}{\ln(n)}} + e^{-K}. \quad (\text{A78})$$

We can now take  $K$  such that  $\ln(K) = \left[ \ln \left( \frac{t_1}{\|x - x_0\|^d} \right) \right]^\alpha$ , for some fixed  $\alpha$  satisfying  $0 < \alpha < 1$ . It is clear that  $K$  satisfies  $K < \frac{t_1}{\|x - x_0\|^d}$ . In addition, we have  $\lim_Z K = +\infty$  and  $\lim_Z \frac{\ln(K)}{\ln(n)} = 0$ , implying that the  $\lim_Z$  of the upper bound in Eq. (A78) is also  $\frac{1}{1+Z}$ , with a relative difference of order  $1/[\ln(n)]^{1-\alpha}$  for finite  $n$  (the closer  $\alpha > 0$  to 0, the more stringent this bound will be).

Finally, since  $\lim_Z L_2 = 0$ , we have shown that for any real  $Z \geq 0$ ,  $\lim_Z L_1^\pm = \lim_Z L_0(x) = \frac{1}{1+Z}$ , which proves Theorem 2. Note that the two bounds obtained suggest that the relative error between  $L_0(x)$  and  $\frac{1}{1+Z}$  for finite large  $n$  and large  $\|x - x_0\|^{-d}$  with  $z(n, x_0)$  remaining close to  $Z$  is of order  $1/\ln(n)$ , or equivalently, of order  $1/\ln(\|x - x_0\|)$ .

1166 *Numerical simulations for the Lagrange function at finite  $n$*

1167 In Fig. 1c, we illustrate numerically the scaling result of Theorem 2.

1168 Note that, exploiting Theorem 2, we can use a simple heuristic argument to  
 1169 estimate the tail of the distribution of the random variable  $W = w_0(x)$ . Indeed,  
 1170 approximating  $L_0(x)$  for finite but large  $n$  by its asymptotic form  $\frac{1}{1+z_x(n,x_0)}$ , with  
 1171  $z_x(n, x_0) = V_d \rho(x) n \log(n) \|x - x_0\|^d$ , we obtain

$$\int_W^1 P(W') dW' \sim \int \rho(x_0) \theta \left( \frac{1}{1 + V_d \rho(x) n \log(n) \|x - x_0\|^d} - W \right) d^d x_0, \quad (\text{A79})$$

$$\sim V_d \rho(x) \int_0^{+\infty} \theta \left( \frac{1}{1 + V_d \rho(x) n \log(n) u} - W \right) du, \quad (\text{A80})$$

$$\sim \frac{1}{n \ln(n) W} \implies P(W) \sim \frac{1}{n \ln(n) W^2}, \quad (\text{A81})$$

1172 where  $\theta(\cdot)$  is the Heaviside function. This heuristic result is again perfectly consistent  
 1173 with our guess (see the discussion below Theorem 1) that  $P(W) = \frac{1}{W_n} p\left(\frac{W}{W_n}\right)$ , with the  
 1174 scaling function  $p$  having the universal tail,  $p(w) \underset{w \rightarrow +\infty}{\sim} w^{-2}$ , and a scale  $W_n \sim \frac{1}{n \ln(n)}$ .

1175 Indeed, in this case and in the limit  $n \rightarrow +\infty$ , we obtain that  $P(W) \sim \frac{1}{W_n} \left(\frac{W_n}{W}\right)^2 \sim$   
 1176  $\frac{W_n}{W^2} \sim \frac{1}{n \ln(n) W^2}$ , which is identical to the result of Eq. (A81).

#### 1177 A.4 The variance term

We define the variance term  $\mathcal{V}(x)$  as

$$\mathcal{V}(x) = \mathbb{E} \left[ \sum_{i=0}^n w_i^2(x) [y_i - f(x_i)]^2 \right] = \mathbb{E}_X \left[ \sum_{i=0}^n w_i^2(x) \sigma^2(x_i) \right] = (n+1) \mathbb{E} \left[ w_0^2(x) \sigma^2(x_0) \right]. \quad (\text{A82})$$

If we first assume that  $\sigma^2(x)$  is bounded by  $\sigma_0^2$ , we can readily bound  $\mathcal{V}(x)$  using Theorem 1 with  $\beta = 2$ :

$$\mathcal{V}(x) \leq (n+1) \sigma_0^2 \mathbb{E} \left[ w_0^2(x) \right]. \quad (\text{A83})$$

Hence, for any  $\varepsilon > 0$ , there exists a constant  $N_{x,\varepsilon}$ , such that for  $n \geq N_{x,\varepsilon}$ , we obtain Theorem 3

$$\mathcal{V}(x) \leq (1 + \varepsilon) \frac{\sigma_0^2}{\ln(n)}. \quad (\text{A84})$$

However, one can obtain an exact asymptotic equivalent for  $\mathcal{V}(x)$  by assuming that  $\sigma^2$  is continuous at  $x$  (with  $\sigma^2(x) > 0$ ), while relaxing the boundedness condition. Indeed, we now assume the growth condition  $C_{\text{Growth}}^\sigma$

$$\int \rho(y) \frac{\sigma^2(y)}{1 + \|y\|^{2d}} d^d y < \infty. \quad (\text{A85})$$

1178 Note that this condition can be satisfied even in the case where the mean variance  
 1179  $\int \rho(y) \sigma^2(y) d^d y$  is infinite.

Proceeding along the very same line as the proof of Theorem 1 in section A.2, we can write

$$\mathbb{E} \left[ w_0^2(x) \sigma^2(x_0) \right] = \int_0^{+\infty} t \psi^n(x, t) \phi(x, t) dt, \quad (\text{A86})$$

with

$$\phi(x, t) := \int \rho(x + y) \sigma^2(x + y) \frac{e^{-\frac{t}{\|y\|^d}}}{\|y\|^{2d}} d^d y, \quad (\text{A87})$$

1180 which as a similar form as Eq. (A5), with  $\beta = 2$ . The condition of Eq. (A85) ensures  
1181 that the integral defining  $\phi(x, t)$  converges for all  $t > 0$ .

The continuity of  $\sigma^2$  at  $x$  (and hence of  $\rho\sigma^2$ ) and the fact the  $\rho(x)\sigma^2(x) > 0$  implies the existence of a small enough  $\lambda > 0$  such that the ball  $B(x, \lambda) \subset \Omega^\circ$  and  $\|y\| \leq \lambda \implies |\rho(x + y)\sigma^2(x + y) - \rho(x)\sigma^2(x)| \leq \varepsilon \rho(x)\sigma^2(x)$ , a property exploited for  $\rho$  in the proof of Theorem 1 (see Eq. (A18) and the paragraph above it), and which can now be used to efficiently bound  $\phi(x, t)$ . In addition, using the method of proof of Theorem 1 (see Eq. (A30)) also requires that  $\int_{\|y\| \geq \lambda} \rho(y) \frac{\sigma^2(y)}{\|y\|^{2d}} d^d y < \infty$ , which is ensured by the condition  $C_{\text{Growth}}^\sigma$  of Eq. (A85). Apart from these details, one can proceed strictly along the proof and Theorem 1, leading to the proof of Theorem 4:

$$\mathcal{V}(x) \underset{n \rightarrow +\infty}{\sim} \frac{\sigma^2(x)}{\ln(n)}. \quad (\text{A88})$$

Note that if  $\sigma^2(x) = 0$ , one can straightforwardly show that for any  $\varepsilon > 0$ , and for  $n$  large enough, one has

$$\mathcal{V}(x) \leq \frac{\varepsilon}{\ln(n)}, \quad (\text{A89})$$

1182 while a more optimal estimate can be easily obtained if one specifies how  $\sigma^2$  vanishes  
1183 at  $x$ .

## 1184 A.5 The bias term

1185 This section aims at proving Theorem 5, 6, and 7.

1186 *Assumptions*

We first impose the following growth condition  $C_{\text{Growth}}^f$  for  $f(x) := \mathbb{E}[Y \mid X = x]$ :

$$\int \rho(y) \frac{f^2(y)}{(1 + \|y\|^d)^2} d^d y < \infty, \quad (\text{A90})$$

which is obviously satisfied if  $f$  is bounded. Since  $\rho$  is assumed to have a second moment, the condition  $C_{\text{Growth}}^f$  is also satisfied for any function satisfying  $|f(x)| \leq A_f \|y\|^{d+1}$  for all  $y$ , such that  $\|y\| \geq R_f$ , for some  $R_f > 0$ . Using the Cauchy-Schwartz inequality, we find that the condition  $C_{\text{Growth}}^f$  also implies that

$$\int \rho(y) \frac{|f(y)|}{1 + \|y\|^d} d^d y < \infty. \quad (\text{A91})$$

In addition, for any  $x \in \Omega^\circ$  (so that  $\rho(x) > 0$ ), we assume that there exists a neighborhood of  $x$  such that  $f$  satisfies a local Hölder condition. In other words, there exist  $\delta_x > 0$ ,  $K_x > 0$ , and  $\alpha_x > 0$ , such that the ball  $B(0, \delta_x) \subset \Omega$ , and

$$\|y\| \leq \delta_x \implies |f(x+y) - f(x)| \leq K_x \|y\|^{\alpha_x}, \quad (\text{A92})$$

1187 which defines condition  $C_{\text{Holder}}^f$ .

1188 *Definition of the bias term and preparatory results*

1189 We define the bias term  $\mathcal{B}(x)$  as

$$\mathcal{B}(x) = \mathbb{E}_X \left[ \left( \sum_{i=0}^n w_i(x) [f(x_i) - f(x)] \right)^2 \right] = (n+1)\mathcal{B}_1(x) + n(n+1)\mathcal{B}_2(x), \quad (\text{A93})$$

$$\mathcal{B}_1(x) = \frac{1}{n+1} \mathbb{E}_X \left[ \sum_{i=0}^n w_i^2(x) [f(x_i) - f(x)]^2 \right], \quad (\text{A94})$$

$$= \mathbb{E}_X \left[ w_0^2(x) [f(x_0) - f(x)]^2 \right], \quad (\text{A95})$$

$$\mathcal{B}_2(x) = \frac{1}{n(n+1)} \mathbb{E}_X \left[ \sum_{0 \leq i < j \leq n} w_i(x) w_j(x) [f(x_i) - f(x)] [f(x_j) - f(x)] \right], \quad (\text{A96})$$

$$= \mathbb{E}_X \left[ w_0(x) w_1(x) [f(x_0) - f(x)] [f(x_1) - f(x)] \right]. \quad (\text{A97})$$

Exploiting again Eq. (A1) for  $\beta = 2$  like we did in section A.2, we obtain

$$\mathcal{B}_1(x) = \int_0^{+\infty} t \psi^n(x, t) \chi_1(x, t) dt, \quad (\text{A98})$$

where  $\psi(x, t)$  is again the function defined in Eq. (A2), and where

$$\chi_1(x, t) := \int \rho(x+y) e^{-\frac{t}{\|y\|^d}} \frac{(f(x+y) - f(x))^2}{\|y\|^{2d}} d^d y. \quad (\text{A99})$$

1190 For any  $t > 0$ , and under condition  $C_{\text{Growth}}^f$ , the integral defining  $\chi_1(x, t)$  is well-defined.

1191 Moreover,  $\chi_1(x, t)$  is a strictly positive and strictly decreasing function of  $t > 0$ .

Now, defining  $u_i = \|x - x_i\|^{-d}$ ,  $i = 0, \dots, n$  and exploiting again Eq. (A1) for  $\beta = 2$ , we can write

$$w_0(x) w_1(x) = u_0 u_1 \int_0^\infty t e^{-(u_0 + u_1)t - (\sum_{i=2}^n u_i)t} dt \quad (\text{A100})$$

1192 Now taking the expectation value over the  $n+1$  independent variables, we obtain

$$\mathcal{B}_2(x) = \int_0^{+\infty} t \psi^{n-1}(x, t) \chi_2^2(x, t) dt, \quad (\text{A101})$$

where

$$\chi_2(x, t) := \int \rho(x+y) e^{-\frac{t}{\|y\|^d}} \frac{f(x+y) - f(x)}{\|y\|^d} d^d y. \quad (\text{A102})$$

1193 Again, for any  $t > 0$ , and under condition  $C_{\text{Growth}}^f$ , the integral defining  $\chi_2(x, t)$  is  
 1194 well-defined. Note that, the integral defining  $\chi_2(x, 0)$  is well-behaved at  $y = 0$  under  
 1195 condition  $C_{\text{Holder}}^f$ . Indeed, for  $\|y\| \leq \delta_x$ , we have  $\frac{|f(x+y) - f(x)|}{\|y\|^d} \leq K_x \|y\|^{-d+\alpha_x}$ , which  
 1196 is integrable at  $y = 0$  in dimension  $d$ . Note that, if  $f(x+y) - f(x)$  were only decaying  
 1197 as  $\text{const.}/\ln(\|y\|)$ , then  $|\chi_2(x, t)| \sim \text{const.} \ln(|\ln(t)|) \rightarrow +\infty$ , when  $t \rightarrow 0$ , and  $\chi_2(x, 0)$   
 1198 would not exist (see the end of this section where we relax the local Hölder condition).

From now, we denote

$$\kappa(x) := \chi_2(x, 0) = \int \rho(x+y) \frac{f(x+y) - f(x)}{\|y\|^d} d^d y. \quad (\text{A103})$$

1199 Also note that  $\kappa(x) = 0$  is possible, even if  $f$  is not constant. For instance, if  $\Omega$  is  
 1200 a sphere centered at  $x$  or  $\Omega = \mathbb{R}^d$ , if  $\rho(x+y) = \hat{\rho}(\|y\|)$  is isotropic around  $x$  and,  
 1201 if  $f_x : y \mapsto f(x+y)$  is an odd function of  $y$ , then we indeed have  $\kappa(x) = 0$  at the  
 1202 symmetry point  $x$ .

1203 *Upper bound for  $\mathcal{B}_1(x)$*

1204 For  $\varepsilon > 0$ , we define  $\lambda$  like in section A.2 and define  $\eta = \min(\lambda, \delta_x)$ , so that

$$\chi_1(x, t) \leq (1 + \varepsilon) K_x \rho(x) \int_{\|y\| \leq \eta} e^{-\frac{t}{\|y\|^d}} \|y\|^{2(\alpha_x - d)} d^d y + \Lambda_x, \quad (\text{A104})$$

$$\Lambda_x = \int_{\|y\| \geq \eta} \rho(x+y) \frac{(f(x+y) - f(x))^2}{\|y\|^{2d}} d^d y, \quad (\text{A105})$$

1205 where the constant  $\Lambda_x < \infty$  under condition  $C_{\text{Growth}}^f$ . The integral in Eq. (A104), can  
 1206 be written as

$$\int_{\|y\| \leq \eta} e^{-\frac{t}{\|y\|^d}} \|y\|^{2(\alpha_x - d)} d^d y = S_d \int_0^\eta e^{-\frac{t}{r^d}} r^{2\alpha_x - d - 1} dr, \quad (\text{A106})$$

$$= V_d t^{\frac{2\alpha_x}{d} - 1} \int_{\frac{t}{\eta^d}}^{+\infty} u^{-\frac{2\alpha_x}{d}} e^{-u} du, \quad (\text{A107})$$

1207 Hence, we find that  $\chi_1(x, t)$  is bounded for  $\alpha_x > d/2$ . For  $\alpha_x < d/2$ , and for  $t < t_1$   
 1208 small enough, there exists a constant  $M(2\alpha_x/d)$  so that  $\chi_1(x, t) \leq M(2\alpha_x/d) t^{\frac{2\alpha_x}{d} - 1}$ .  
 1209 Finally, in the marginal case  $\alpha_x = d/2$  and for  $t < t_1$ , we have  $\chi_1(x, t) \leq M(1) \ln(1/t)$ ,  
 1210 for some constant  $M(1)$ .

1211 Now, exploiting again the upper bound of  $\psi(x, t)$  obtained in section A.2 and  
 1212 repeating the steps to bound the integrals involving  $\psi^n(x, t)$ , we find that, for  $\alpha_x \neq d/2$ ,  
 1213  $\mathcal{B}_1(x)$  is bounded up to a multiplicative constant by

$$\int_0^{t_1} t^{\min(1, \frac{2\alpha_x}{d})} e^{-nV_d\rho(x)t \ln\left(\frac{D_-}{t}\right)} dt \underset{n \rightarrow +\infty}{\sim} M'(2\alpha_x/d) (V_d\rho(x)n \ln(n))^{-\min(2, \frac{2\alpha_x}{d} + 1)} \quad (\text{A108})$$

1214 where  $M'(2\alpha_x/d)$  is a constant depending only on  $2\alpha_x/d$ . In the marginal case,  $\alpha_x =$   
 1215  $d/2$ ,  $\mathcal{B}_1(x)$  is bounded up to a multiplicative constant by  $n^{-2} \ln(n)$ .

In summary, we find that

$$(n+1)\mathcal{B}_1(x) = \begin{cases} O\left(n^{-\frac{2\alpha_x}{d}}(\ln(n))^{-1-\frac{2\alpha_x}{d}}\right), & \text{for } d > 2\alpha_x \\ O\left(n^{-1}(\ln(n))^{-1}\right), & \text{for } d = 2\alpha_x \\ O\left(n^{-1}(\ln(n))^{-2}\right), & \text{for } d < 2\alpha_x \end{cases} \quad (\text{A109})$$

1216 *Asymptotic equivalent for  $\mathcal{B}_2(x)$*

1217 Let us first assume that  $\kappa(x) = \chi_2(x, 0) \neq 0$ . Then again, as shown in detail in  
 1218 section A.2, the integral defining  $\mathcal{B}_2(x)$  is dominated by the small  $t$  region, and will be  
 1219 asymptotically equivalent to

$$\mathcal{B}_2(x) = \int_0^{+\infty} t \psi^{n-1}(x, t) \chi_2^2(x, t) dt, \quad (\text{A110})$$

$$\underset{n \rightarrow +\infty}{\sim} \kappa^2(x) \int_0^{t_1} t e^{-nV_d\rho(x)t \ln\left(\frac{D_\pm}{t}\right)} dt, \quad (\text{A111})$$

$$\underset{n \rightarrow +\infty}{\sim} \left( \frac{\kappa(x)}{V_d\rho(x)n \ln(n)} \right)^2. \quad (\text{A112})$$

1220 On the other hand, if  $\kappa(x) = 0$ , one can bound  $\chi_2(x, t)$  (up to a multiplicative constant)  
 1221 for  $t \leq t_1$  by the integral

$$\begin{aligned} \int_{\|y\| \leq \eta} \left(1 - e^{-\frac{t}{\|y\|^d}}\right) \|y\|^{\alpha_x-d} d^d y &= S_d \int_0^\eta \left(1 - e^{-\frac{t}{r^d}}\right) r^{\alpha_x-d} r^{d-1} dr, \quad (\text{A113}) \\ &= V_d t^{\frac{\alpha_x}{d}} \int_{\frac{t}{\eta^d}}^{+\infty} u^{-1-\frac{\alpha_x}{d}} (1 - e^{-u}) du. \quad (\text{A114}) \end{aligned}$$

Hence, for  $\kappa(x) = 0$ , we find that

$$n(n+1)\mathcal{B}_2(x) = O\left(n^{-\frac{2\alpha_x}{d}}(\ln(n))^{-2-\frac{2\alpha_x}{d}}\right). \quad (\text{A115})$$

1222 *Asymptotic equivalent for the bias term  $\mathcal{B}(x)$*

In the generic case  $\kappa(x) \neq 0$ , we find that  $(n+1)\mathcal{B}_1(x)$  is always dominated by  
 $n(n+1)\mathcal{B}_2(x)$ , and we find the following asymptotic equivalent for  $\mathcal{B}(x) = (n+1)\mathcal{B}_1(x) +$   
 $n(n+1)\mathcal{B}_2(x)$ :

$$\mathcal{B}(x) \underset{n \rightarrow +\infty}{\sim} \left( \frac{\kappa(x)}{V_d\rho(x) \ln(n)} \right)^2. \quad (\text{A116})$$



In the non-generic case  $\kappa(x) = 0$ , the bound for  $(n+1)\mathcal{B}_1(x)$  in Eq. (A109) is always more stringent than the bound for  $n(n+1)\mathcal{B}_2(x)$  in Eq. (A115), leading to

$$\mathcal{B}(x) = \begin{cases} O\left(n^{-\frac{2\alpha_x}{d}}(\ln(n))^{-1-\frac{2\alpha_x}{d}}\right), & \text{for } d > 2\alpha_x \\ O\left(n^{-1}(\ln(n))^{-1}\right), & \text{for } d = 2\alpha_x \\ O\left(n^{-1}(\ln(n))^{-2}\right), & \text{for } d < 2\alpha_x \end{cases}, \quad (\text{A117})$$

1223 which proves the statements made in Theorem 5.

1224 *Interpretation of the bias term  $\mathcal{B}(x)$  for  $\kappa(x) \neq 0$*

1225 Here, we assume the generic case  $\kappa(x) \neq 0$  and define  $\bar{f}(x) = \mathbb{E}[\hat{f}(x)]$ . We have

$$\Delta(x) := \mathbb{E}\left[\sum_{i=0}^n w_i(x)(f(x_i) - f(x))\right] = \bar{f}(x) - f(x), \quad (\text{A118})$$

$$\bar{f}(x) = \mathbb{E}\left[\sum_{i=0}^n w_i(x)f(x_i)\right] = (n+1)\mathbb{E}[w_0(x)f(x_0)]. \quad (\text{A119})$$

1226 By using another time Eq. (A1), we find that,

$$\Delta(x) = (n+1) \int_0^{+\infty} \psi^n(x, t) \chi_2(x, t) dt, \quad (\text{A120})$$

$$\underset{n \rightarrow +\infty}{\sim} n \kappa(x) \int_0^{t_1} e^{-nV_d \rho(x)t \ln\left(\frac{D_{\pm}}{t}\right)} dt, \quad (\text{A121})$$

$$\underset{n \rightarrow +\infty}{\sim} \frac{\kappa(x)}{V_d \rho(x) \ln(n)}. \quad (\text{A122})$$

Comparing this result to the one of Eq. (A116), we find that the bias  $\mathcal{B}(x)$  is asymptotically dominated by the square of the difference  $\Delta^2(x)$  between  $\bar{f}(x) = \mathbb{E}[\hat{f}(x)]$  and  $f(x)$ :

$$\mathcal{B}(x) \underset{n \rightarrow +\infty}{\sim} \left(\mathbb{E}[\hat{f}(x)] - f(x)\right)^2, \quad (\text{A123})$$

1227 a statement made in Theorem 5.

1228 *Relaxing the local Hölder condition*

1229 We now only assume the condition  $C_{\text{Cont.}}^f$  that  $f$  is continuous at  $x$  (but still  
1230 assuming the growth conditions). We can now define  $\delta_x$  such that the ball  $B(x, \delta) \subset \Omega^\circ$   
1231 and  $\|y\| \leq \delta_x \implies |f(x+y) - f(x)| \leq \varepsilon$ . Then, the proof proceeds as above, but by  
1232 replacing  $K_x$  by  $\varepsilon$ ,  $\alpha_x$  by 0, and by updating the bounds for  $\chi_1(x, t)$  (for which this  
1233 replacement is safe) and  $\chi_2(x, t)$  (for which it is not). We now find that for  $0 < t \leq t_1$ ,

1234 with  $t_1$  small enough

$$0 \leq \chi_1(x, t) \leq \varepsilon(1 + 2\varepsilon)V_d\rho(x)t^{-1}, \quad (\text{A124})$$

$$|\chi_2(x, t)| \leq \varepsilon(1 + 2\varepsilon)V_d\rho(x) \ln\left(\frac{1}{t}\right). \quad (\text{A125})$$

As already mentioned below Eq. (A102), where we provided an explicit counterexample, we see that relaxing the local Hölder condition does not guarantee anymore that  $\lim_{t \rightarrow 0} |\chi_2(x, 0)| < \infty$ . With these new bounds, and carrying the rest of the calculation as in the previous sections, we ultimately find the following weaker result compared to Eq. (A116) and Eq. (A117):

$$\mathcal{B}(x) = o\left(\frac{1}{\ln(n)}\right), \quad (\text{A126})$$

or equivalently, that for any  $\varepsilon > 0$ , there exists a constant  $N_{x,\varepsilon}$  such that, for  $n \geq N_{x,\varepsilon}$ , we have

$$\mathcal{B}(x) \leq \frac{\varepsilon}{\ln(n)}, \quad (\text{A127})$$

1235 which proves Theorem 6.

1236 *The bias term at a point where  $\rho(x) = 0$*

This section aims at proving Theorem 7 expressing the lack of convergence of the estimator  $\hat{f}(x)$  to  $f(x)$ , when  $\rho(x) = 0$ , and under mild conditions. Let us now consider a point  $x \in \partial\Omega$  for which  $\rho(x) = 0$ , let us assume that there exists constants  $\eta_x, \gamma_x > 0$ , and  $G_x > 0$ , such that  $\rho$  satisfies the local Hölder condition at  $x$

$$\|y\| \leq \eta_x \implies \rho(x + y) \leq G_x \|y\|^{\gamma_x}. \quad (\text{A128})$$

1237 We will also assume that the growth condition of Eq. (A91) is satisfied. With these  
1238 two conditions,  $\kappa(x)$  defined in Eq. (A103) exists. The vanishing of  $\rho$  at  $x$  strongly  
1239 affects the behavior of  $\psi(x, t)$  in the limit  $t \rightarrow 0$ , which is not singular anymore:

$$1 - \psi(x, t) \underset{t \rightarrow 0}{\sim} t \int \rho(y) \|x - y\|^{-d} d^d y, \quad (\text{A129})$$

1240 where the convergence of the integral  $\lambda(x) := \int \rho(y) \|x - y\|^{-d} d^d y$  is ensured by the  
1241 local Hölder condition of  $\rho$  at  $x$ .

1242 Let us now evaluate  $\bar{f}(x) = \lim_{n \rightarrow +\infty} \mathbb{E}[\hat{f}(x)]$ , the expectation value of the estimator  
1243  $\hat{f}(x)$  in the limit  $n \rightarrow +\infty$ , introduced in Eq. (A119). First assuming,  $\kappa(x) = \chi_2(x, 0) \neq$   
1244 0, we obtain

$$\bar{f}(x) - f(x) = \lim_{n \rightarrow +\infty} (n + 1) \int_0^{+\infty} \psi^n(x, t) \chi_2(x, t) dt, \quad (\text{A130})$$

$$= \lim_{n \rightarrow +\infty} n \chi_2(x, 0) \int_0^{t_1} e^{n t \partial_t \psi(x, 0)} dt, \quad (\text{A131})$$

$$= \frac{\kappa(x)}{\lambda(x)}, \quad (\text{A132})$$

1245 which shows that the bias term does not vanish in the limit  $n \rightarrow +\infty$ . Eq. (A132)  
 1246 can be straightforwardly shown to remain valid when  $\kappa(x) = 0$ . Indeed, for any  $\varepsilon > 0$   
 1247 chosen arbitrarily small, we can choose  $t_1$  small enough such that  $|\chi_2(x, t)| \leq \varepsilon$  for  
 1248  $0 \leq t \leq t_1$ , which leads to  $|\bar{f}(x) - f(x)| \leq \varepsilon/\lambda(x)$ .

1249 Note that relaxing the local Hölder condition for  $\rho$  at  $x$  and only assuming the  
 1250 continuity of  $f$  at  $x$  and  $\kappa(x) \neq 0$  is not enough to guarantee that  $\bar{f}(x) \neq f(x)$ . For  
 1251 instance, if  $\rho(x+y) \sim_{y \rightarrow 0} \rho_0/\ln(1/|y|)$ , and there exists a local solid angle  $\omega_x > 0$   
 1252 at  $x$ , one can show that  $1 - \psi(x, t) \sim_{t \rightarrow 0} \omega_x S_d \rho_0 t \ln(\ln(1/t))$ , and the bias would still  
 1253 vanish in the limit  $n \rightarrow +\infty$ , with  $\hat{f}(x) - f(x) \sim_{n \rightarrow +\infty} \kappa(x)/[\omega_x S_d \rho_0 \ln(\ln(n))]$ .

## 1254 A.6 Asymptotic equivalent for the regression risk

This section aims at proving Theorem 8. Under conditions  $C_{\text{Growth}}^\sigma$ ,  $C_{\text{Growth}}^f$ , and  $C_{\text{Cont.}}^f$ , the results of Eq. (A88) and Eq. (A126) show that for  $\rho(x)\sigma^2(x) > 0$  and  $\rho$  and  $\sigma^2$  continuous at  $x$ , the bias term  $\mathcal{B}(x)$  is always dominated by the variance term  $\mathcal{V}(x)$  in the limit  $n \rightarrow +\infty$ . Thus, the excess regression risk satisfies

$$\mathbb{E}[(\hat{f}(x) - f(x))^2] \underset{n \rightarrow +\infty}{\sim} \frac{\sigma^2(x)}{\ln(n)}. \quad (\text{A133})$$

As a consequence, the Hilbert kernel estimate converges pointwise to the regression function in probability. Indeed, for  $\delta > 0$ , there exists a constant  $N_{x,\delta}$ , such that

$$\mathbb{E}[(\hat{f}(x) - f(x))^2] \leq (1 + \delta) \frac{\sigma^2(x)}{\ln(n)}, \quad (\text{A134})$$

for  $n \geq N_{x,\delta}$ . Moreover, for any  $\varepsilon > 0$ , since  $\mathbb{E}[(\hat{f}(x) - f(x))^2] \geq \varepsilon^2 \mathbb{P}[|\hat{f}(x) - f(x)| \geq \varepsilon]$ , we deduce the following Chebyshev bound, valid for  $n \geq N_{x,\delta}$

$$\mathbb{P}[|\hat{f}(x) - f(x)| \geq \varepsilon] \leq \frac{1 + \delta}{\varepsilon^2} \frac{\sigma^2(x)}{\ln(n)}. \quad (\text{A135})$$

## 1255 A.7 Rates for the plugin classifier

In the case of binary classification  $Y \in \{0, 1\}$  and  $f(x) = \mathbb{P}[Y = 1 \mid X = x]$ . Let  $F: \mathbb{R}^d \rightarrow \{0, 1\}$  denote the Bayes optimal classifier, defined by  $F(x) := \theta(f(x) - 1/2)$  where  $\theta(\cdot)$  is the Heaviside theta function. This classifier minimizes the risk  $\mathcal{R}_{0/1}(h) := \mathbb{E}[\mathbf{1}_{\{h(X) \neq Y\}}] = \mathbb{P}[h(X) \neq Y]$  under zero-one loss. Given the regression estimator  $\hat{f}$ , we consider the plugin classifier  $\hat{F}(x) = \theta(\hat{f}(x) - \frac{1}{2})$ , and we will exploit the fact that

$$0 \leq \mathbb{E}[\mathcal{R}_{0/1}(\hat{F}(x))] - \mathcal{R}_{0/1}(F(x)) \leq 2 \mathbb{E}[|\hat{f}(x) - f(x)|] \leq 2 \sqrt{\mathbb{E}[(\hat{f}(x) - f(x))^2]} \quad (\text{A136})$$

1256 *Proof of Eq. (A136)*

1257 For the sake of completeness, let us briefly prove the result of Eq. (A136). The  
 1258 rightmost inequality is simply obtained from the Cauchy-Schwartz inequality, and

we hence focus on proving the first inequality. Obviously, Eq. (A136) is satisfied for  $f(x) = 1/2$ , for which  $\mathbb{E}[\mathcal{R}_{0/1}(\hat{F}(x))] = \mathcal{R}_{0/1}(F(x)) = 1/2$ .  
 If  $f(x) > 1/2$ , we have  $F(x) = 1$ ,  $\mathcal{R}_{0/1}(F(x)) = 1 - f(x)$ , and

$$\mathbb{E}[\mathcal{R}_{0/1}(\hat{F}(x))] = f(x)\mathbb{P}[\hat{f}(x) \leq 1/2] + (1 - f(x))\mathbb{P}[\hat{f}(x) \geq 1/2], \quad (\text{A137})$$

$$= \mathcal{R}_{0/1}(F(x)) + (2f(x) - 1)\mathbb{P}[\hat{f}(x) \leq 1/2], \quad (\text{A138})$$

which implies  $\mathbb{E}[\mathcal{R}_{0/1}(\hat{F}(x))] \geq \mathcal{R}_{0/1}(F(x))$ . Since  $\mathbb{P}[\hat{f}(x) \leq 1/2] = \mathbb{E}[\theta(1/2 - \hat{f}(x))]$ , and using  $\theta(1/2 - \hat{f}(x)) \leq \frac{|\hat{f}(x) - f(x)|}{f(x) - 1/2}$ , valid for any  $1/2 < f(x) \leq 1$ , we readily obtain Eq. (A136).

Similarly, in the case  $f(x) < 1/2$ , we have  $F(x) = 0$ ,  $\mathcal{R}_{0/1}(F(x)) = f(x)$ , and

$$\mathbb{E}[\mathcal{R}_{0/1}(\hat{F}(x))] = \mathcal{R}_{0/1}(F(x)) + (1 - 2f(x))\mathbb{P}[\hat{f}(x) \geq 1/2]. \quad (\text{A139})$$

Since  $\mathbb{P}[\hat{f}(x) \geq 1/2] = \mathbb{E}[\theta(\hat{f}(x) - 1/2)]$ , and using  $\theta(\hat{f}(x) - 1/2) \leq \frac{|\hat{f}(x) - f(x)|}{1/2 - f(x)}$ , valid for any  $0 \leq f(x) < 1/2$ , we again obtain Eq. (A136) in this case.

In fact, for any  $\alpha > 0$ , the inequalities  $\theta(1/2 - \hat{f}(x)) \leq \left(\frac{|\hat{f}(x) - f(x)|}{f(x) - 1/2}\right)^\alpha$  and  $\theta(\hat{f}(x) - 1/2) \leq \left(\frac{|\hat{f}(x) - f(x)|}{1/2 - f(x)}\right)^\alpha$  hold, respectively, for  $f(x) > 1/2$  and  $f(x) < 1/2$ . Combining this remark with the use of the Hölder inequality leads to

$$\mathbb{E}[\mathcal{R}_{0/1}(\hat{F}(x))] - \mathcal{R}_{0/1}(F(x)) \leq 2|f(x) - 1/2|^{1-\alpha} \mathbb{E}\left[|\hat{f}(x) - f(x)|^\alpha\right], \quad (\text{A140})$$

$$\leq 2|f(x) - 1/2|^{1-\alpha} \mathbb{E}\left[|\hat{f}(x) - f(x)|^{\frac{\alpha}{\beta}}\right]^\beta, \quad (\text{A141})$$

for any  $0 < \beta \leq 1$ . In particular, for  $0 < \alpha < 1$  and  $\beta = \alpha/2$ , we obtain

$$0 \leq \mathbb{E}[\mathcal{R}_{0/1}(\hat{F}(x))] - \mathcal{R}_{0/1}(F(x)) \leq 2|f(x) - 1/2|^{1-\alpha} \mathbb{E}\left[|\hat{f}(x) - f(x)|^2\right]^{\frac{\alpha}{2}}. \quad (\text{A142})$$

The interest of this last bound compared to the more classical bound of Eq. (A136) is to show explicitly the cancellation of the classification risk as  $f(x) \rightarrow 1/2$ , while still involving the regression risk  $\mathbb{E}\left[|\hat{f}(x) - f(x)|^2\right]$  (to the power  $\alpha/2 < 1/2$ ).

*Bound for the classification risk*

Now exploiting the results of section A.6 for the regression risk, and the two inequalities Eq. (A136) and Eq. (A142), we readily obtain Theorem 9.

## A.8 Extrapolation behavior outside the support of $\rho$

This section aims at proving Theorem 10 characterizing the behavior of the regression estimator  $\hat{f}$  outside the closed support  $\bar{\Omega}$  of  $\rho$  (extrapolation).

*Extrapolation estimator in the limit  $n \rightarrow \infty$*

We first assume the growth condition  $\int \rho(y) \frac{|f(y)|}{1+\|y\|^d} d^d y < \infty$ . For  $x \in \mathbb{R}^d$  (i.e., not necessarily in  $\Omega$ ), we have quite generally

$$\mathbb{E} [\hat{f}(x)] = (n+1) \mathbb{E} [w_0(x) f(x)] = (n+1) \int_0^{+\infty} \psi^n(x, t) \chi(x, t) dt, \quad (\text{A143})$$

where  $\psi(x, t)$  is again given by Eq. (A2) and

$$\chi(x, t) := \int \rho(x+y) f(x+y) \frac{e^{-\frac{t}{\|y\|^d}}}{\|y\|^d} d^d y, \quad (\text{A144})$$

which is finite for any  $t > 0$ , thanks to the above growth condition for  $f$ .

Let us now assume that the point  $x$  is not in the closed support  $\bar{\Omega}$  of the distribution  $\rho$  (which excludes the case  $\Omega = \mathbb{R}^d$ ). Since the integral in Eq. (A143) is again dominated by its  $t \rightarrow 0$  behavior, we have to evaluate  $\psi(x, t)$  and  $\chi(x, t)$  in this limit, like in the different proofs above. In fact, when  $x \notin \bar{\Omega}$ , the integral defining  $\psi(x, t)$  and  $\chi(x, t)$  are not singular anymore, and we obtain

$$1 - \psi(x, t) \underset{t \rightarrow 0}{\sim} t \int \rho(y) \|x - y\|^{-d} d^d y, \quad (\text{A145})$$

$$\chi(x, 0) = \int \rho(y) f(y) \|x - y\|^{-d} d^d y. \quad (\text{A146})$$

Note that  $\psi(x, t)$  has the very same linear behavior as in Eq. (A129), when we assumed  $x \in \partial\Omega$  with  $\rho(x) = 0$ , and a local Hölder condition for  $\rho$  at  $x$ .

Finally, by using the same method as in the previous sections to evaluate the integral of Eq. (A143) in the limit  $n \rightarrow +\infty$ , we obtain

$$\int_0^{+\infty} \psi^n(x, t) \chi(x, t) dt \underset{n \rightarrow +\infty}{\sim} \chi(x, 0) \int_0^{t_1} e^{n t \partial_t \psi(x, 0)} dt, \quad (\text{A147})$$

$$\underset{n \rightarrow +\infty}{\sim} \frac{1}{n} \frac{\chi(x, 0)}{|\partial_t \psi(x, 0)|}, \quad (\text{A148})$$

which leads to the first result of Theorem 10:

$$\hat{f}_\infty(x) := \lim_{n \rightarrow +\infty} \mathbb{E} [\hat{f}(x)] = \frac{\int \rho(y) f(y) \|x - y\|^{-d} d^d y}{\int \rho(y) \|x - y\|^{-d} d^d y}. \quad (\text{A149})$$

Note that since the function  $(x, y) \mapsto \|x - y\|^{-d}$  is continuous at all points  $x \notin \bar{\Omega}$ ,  $y \in \Omega$ , and thanks to the absolute convergence of the integrals defining  $\hat{f}_\infty(x)$ , standard methods show that  $\hat{f}_\infty$  is continuous (in fact, infinitely differentiable) at all  $x \notin \bar{\Omega}$ .

*Extrapolation far from  $\Omega$*

Let us now investigate the behavior of  $\hat{f}_\infty(x)$  when the distance  $L := d(x, \Omega) = \inf\{\|x - y\|, y \in \Omega\} > 0$  between  $x$  and  $\Omega$  goes to infinity, which can only happen for

certain  $\Omega$ , in particular, when  $\Omega$  is bounded. We now assume the stronger condition,  $\langle |f| \rangle := \int \rho(y) |f(y)| d^d y < \infty$ , such that the  $\rho$ -mean of  $f$ ,  $\langle f \rangle := \int \rho(y) f(y) d^d y$ , is finite. We consider a point  $y_0 \in \Omega$ , so that  $\|x - y_0\| \geq L > 0$ , and we will exploit the following inequality, valid for any  $y \in \Omega$  satisfying  $\|y - y_0\| \leq R$ , with  $R > 0$ :

$$0 \leq 1 - \frac{L^d}{\|x - y\|^d} \leq \frac{\|x - y\|^d - L^d}{L^d} \leq \frac{(L + R)^d - L^d}{L^d} \leq e^{\frac{dR}{L}} - 1. \quad (\text{A150})$$

Now, for a given  $\varepsilon > 0$ , there exist  $R > 0$  large enough such that  $\int_{\|y - y_0\| \geq R} \rho(y) d^d y \leq \varepsilon/2$  and  $\int_{\|y - y_0\| \geq R} \rho(y) |f(y)| d^d y \leq \varepsilon/2$ . Then, for such a  $R$ , we consider  $L$  large enough such that the above bound satisfies  $e^{\frac{dR}{L}} - 1 \leq \varepsilon \min(1/\langle |f| \rangle, 1)/2$ . We then obtain

$$\left| L^d \int \rho(y) f(y) \|x - y\|^{-d} d^d y - \langle f \rangle \right| \leq \left( e^{\frac{dR}{L}} - 1 \right) \int_{\|y - y_0\| \leq R} \rho(y) |f(y)| d^d y \quad (\text{A151})$$

$$+ \int_{\|y - y_0\| \geq R} \rho(y) |f(y)| d^d y, \quad (\text{A152})$$

$$\leq \frac{\varepsilon}{2\langle |f| \rangle} \times \langle |f| \rangle + \frac{\varepsilon}{2} \leq \varepsilon, \quad (\text{A153})$$

which shows that under the condition  $\langle |f| \rangle < \infty$ , we have

$$\lim_{d(x, \Omega) \rightarrow +\infty} d^d(x, \Omega) \int \rho(y) f(y) \|x - y\|^{-d} d^d y = \langle f \rangle. \quad (\text{A154})$$

Similarly, one can show that

$$\lim_{d(x, \Omega) \rightarrow +\infty} d^d(x, \Omega) \int \rho(y) \|x - y\|^{-d} d^d y = \int \rho(y) d^d y = 1. \quad (\text{A155})$$

Finally, we obtain the second result of Theorem 10,

$$\lim_{d(x, \Omega) \rightarrow +\infty} \hat{f}_\infty(x) = \langle f \rangle. \quad (\text{A156})$$

*Continuity of the extrapolation*

We now consider  $x \notin \bar{\Omega}$  and  $y_0 \in \partial\Omega$ , but such that  $\rho(y_0) > 0$  (i.e.,  $y_0 \in \partial\Omega \cap \Omega$ ), and we note  $l := \|x - y_0\| > 0$ . We assume the continuity at  $y_0$  of  $\rho$  and  $f$  as seen as functions restricted to  $\Omega$ , i.e.,  $\lim_{y \in \Omega \rightarrow y_0} \rho(y) = \rho(y_0)$  and  $\lim_{y \in \Omega \rightarrow y_0} f(y) = f(y_0)$ . Hence, for any  $0 < \varepsilon < 1$ , there exists  $\delta > 0$  small enough such that  $y \in \Omega$  and  $\|y - y_0\| \leq \delta \implies |\rho(y_0) - \rho(y)| \leq \varepsilon$  and  $|\rho(y_0)f(y_0) - \rho(y)f(y)| \leq \varepsilon$ . Since we intend to take  $l > 0$  arbitrary small, we can impose  $l < \delta/2$ .

We will also assume that  $\partial\Omega$  is smooth enough near  $y_0$ , such that there exists a strictly positive local solid angle  $\omega_0$  defined by

$$\omega_0 = \lim_{r \rightarrow 0} \frac{1}{V_d \rho(y_0) r^d} \int_{\|y-y_0\| \leq r} \rho(y) d^d y = \lim_{r \rightarrow 0} \frac{1}{V_d r^d} \int_{y \in \Omega / \|y-y_0\| \leq r} d^d y, \quad (\text{A157})$$

where the second inequality results from the continuity of  $\rho$  at  $y_0$  and the fact that  $\rho(y_0) > 0$ . If  $y_0 \in \Omega^\circ$ , we have  $\omega_0 = 1$ , while for  $y_0 \in \partial\Omega$ , we have generally  $0 \leq \omega_0 \leq 1$ . Although we will assume  $\omega_0 > 0$  for our proof below, we note that  $\omega_0 = 0$  or  $\omega_0 = 1$  can happen for  $y_0 \in \partial\Omega$ . For instance, we can consider  $\Omega_0, \Omega_1 \subset \mathbb{R}^2$  respectively defined by  $\Omega_0 = \{(x_1, x_2) \in \mathbb{R}^2 / x_1 \geq 0, |x_2| \leq x_1^2\}$  and  $\Omega_1 = \{(x_1, x_2) \in \mathbb{R}^2 / x_1 \leq 0\} \cup \{(x_1, x_2) \in \mathbb{R}^2 / x_1 \geq 0, |x_2| \geq x_1^2\}$ . Then, it is clear that the local solid angle at the origin  $O = (0, 0)$  is respectively  $\omega_0 = 0$  and  $\omega_0 = 1$ . Also note that if  $x$  is on the surface of a sphere or on the interior of a face of a hypercube (and in general, when the boundary near  $x$  is locally a hyperplane; the generic case), we have  $\omega_x = \frac{1}{2}$ . If  $x$  is a corner of the hypercube, we have  $\omega_x = \frac{1}{2^d}$ .

Returning to our proof, and exploiting Eq. (A157), we consider  $\delta$  small enough such that for all  $0 \leq r \leq \delta$ , we have

$$\left| \int_{y \in \Omega / \|y-y_0\| \leq r} d^d y - \omega_0 V_d r^d \right| \leq \varepsilon \omega_0 V_d r^d. \quad (\text{A158})$$

We can now use these preliminaries to obtain

$$(\rho(y_0)f(y_0) - \varepsilon)J(x) - C \leq \int \rho(y)f(y)\|x-y\|^{-d} d^d y \leq (\rho(y_0)f(y_0) + \varepsilon)J(x) + C, \quad (\text{A159})$$

$$(\rho(y_0) - \varepsilon)J(x) - C' \leq \int \rho(y)\|x-y\|^{-d} d^d y \leq (\rho(y_0) + \varepsilon)J(x) + C', \quad (\text{A160})$$

with

$$J(x) := \int_{y \in \Omega / \|y-y_0\| \leq \delta} \|x-y\|^{-d} d^d y, \quad (\text{A161})$$

$$C = \left(\frac{2}{\delta}\right)^2 \int_{\|y-y_0\| \geq \delta} \rho(y)|f(y)| d^d y, \quad (\text{A162})$$

$$C' = \left(\frac{2}{\delta}\right)^2. \quad (\text{A163})$$

Let us now show that  $\lim_{l \rightarrow 0} J(x) = +\infty$ . We define  $N := [\delta/l] \geq 2$ , where  $[\cdot]$  is the integer part, and we have  $N \geq 2$ , since we have imposed  $l < \delta/2$ . For  $n \in \mathbb{N} \geq 1$ , we define,

$$I_n := \int_{y \in \Omega / \|y-y_0\| \leq \delta/n} d^d y, \quad (\text{A164})$$

1317 and note that we have

$$I_n - I_{n+1} = \int_{\substack{y \in \Omega / \|y - y_0\| \leq \delta/n, \\ \|y - y_0\| \geq \delta/(n+1)}} d^d y, \quad (\text{A165})$$

$$\left| I_n - \omega_0 V_d \left( \frac{\delta}{n} \right)^d \right| \leq \varepsilon \omega_0 V_d \left( \frac{\delta}{n} \right)^d. \quad (\text{A166})$$

1318 We can then write

$$J(x) \geq \sum_{n=1}^N \frac{1}{\left( l + \frac{\delta}{n} \right)^d} (I_n - I_{n+1}), \quad (\text{A167})$$

$$\geq \sum_{n=1}^N \left( \frac{1}{\left( l + \frac{\delta}{n+1} \right)^d} - \frac{1}{\left( l + \frac{\delta}{n} \right)^d} \right) I_{n+1} + \frac{I_1}{(l + \delta)^d} - \frac{I_{N+1}}{\left( l + \frac{\delta}{N+1} \right)^d}. \quad (\text{A168})$$

1319 We have

$$\frac{I_1}{(l + \delta)^d} - \frac{I_{N+1}}{\left( l + \frac{\delta}{N+1} \right)^d} \geq \omega_0 V_d \left( (1 - \varepsilon) \frac{1}{\left( 1 + \frac{l}{\delta} \right)^d} - (1 + \varepsilon) \frac{1}{\left( 1 + \frac{(N+1)l}{\delta} \right)^d} \right) \quad (\text{A169})$$

$$\geq \omega_0 V_d \left( (1 - \varepsilon) \frac{2^d}{3^d} - (1 + \varepsilon) \right) =: C'', \quad (\text{A170})$$

1320 which defines the constant  $C''$ . Now using Eq. (A166),  $l < \delta/2$ ,  $N = \lceil \delta/l \rceil$ , and the fact  
1321 that  $(1 + u)^d - 1 \geq du$ , for any  $u \geq 0$ , we obtain

$$J(x) \geq (1 - \varepsilon) \omega_0 V_d \sum_{n=1}^N \frac{1}{\left( 1 + \frac{(n+1)l}{\delta} \right)^d} \left( \left( \frac{l + \frac{\delta}{n}}{l + \frac{\delta}{n+1}} \right)^d - 1 \right) + C'', \quad (\text{A171})$$

$$\geq (1 - \varepsilon) \omega_0 S_d \sum_{n=1}^N \frac{1}{\left( 1 + \frac{(n+1)l}{\delta} \right)^{d+1}} \frac{1}{n} + C'', \quad (\text{A172})$$

$$\geq \frac{(1 - \varepsilon) \omega_0 S_d}{\left( 1 + \frac{(N+1)l}{\delta} \right)^{d+1}} \ln(N - 1) + C'', \quad (\text{A173})$$

$$\geq (1 - \varepsilon) \omega_0 \left( \frac{2}{5} \right)^{d+1} S_d \ln \left( \frac{\delta}{l} - 2 \right) + C''. \quad (\text{A174})$$

1322 We hence have shown that  $\lim_{l \rightarrow 0} J(x) = +\infty$ . Note that we can obtain an upper  
1323 bound for  $J(x)$  similar to Eq. (A172) in a similar way as above, and with a bit more



work, it is straightforward to show that we in fact have  $J(x) \sim_{l \rightarrow 0} \omega_0 S_d \ln\left(\frac{\delta}{l}\right)$ , a result that we will not need here.

Now, using Eq. (A159) and Eq. (A160) and the fact that  $\lim_{l \rightarrow 0} J(x) = +\infty$ , we find that

$$\int \rho(y) f(y) \|x - y\|^{-d} d^d y \underset{l \rightarrow 0}{\sim} \rho(y_0) f(y_0) J(x), \quad (\text{A175})$$

$$\int \rho(y) \|x - y\|^{-d} d^d y \underset{l \rightarrow 0}{\sim} \rho(y_0) J(x), \quad (\text{A176})$$

for  $f(y_0) \neq 0$  (remember that  $\rho(y_0) > 0$ ), while for  $f(y_0) = 0$ , we obtain  $\int \rho(y) f(y) \|x - y\|^{-d} d^d y = o(J(x))$ . Finally, we have shown that

$$\lim_{x \notin \Omega, x \rightarrow y_0} \hat{f}_\infty(x) = f(y_0), \quad (\text{A177})$$

establishing the continuity of the extrapolation and the last part of Theorem 10.
